# Supplementary material for: Steroid Metabolism in Thermophilic Actinobacterium Saccharopolyspora hirsuta VKM Ac-666T
Source: MDPI journal article supplement (doi:10.3390/microorganisms9122554), 2021-12-10
Supplement: s1 [file s1]

## Supporting materials

**article title:** Steroid Metabolism in Thermophilic Actinobacteria *Saccharopolyspora hirsuta*

VKM Ac-666<sup>T</sup>

**journal name:** Microorganisms

**author names:** Tatyana Lobastova, Victoria Fokina, Sergey Tarlachkov, Andrey Shutov, Eugeny Bragin, Alexey Kazantsev, Marina Donova

**\*Correspondence:** 2vvfokina@gmail.com

**Supplementary Table S6.** Result of BLAST search for the 29 protein sequences from the *M. tuberculosis* steroid catabolism enzymes in the *Geobacillus kaustophilus* HTA426 and *Parageobacillus thermoglucosidasius* DSM 2542 genomes.

| No. | Protein | <i>Geobacillus kaustophilus</i> HTA426.<br>BA000043.1 |                                 |                            | <i>Parageobacillus thermoglucosidasius</i> DSM 2542.<br>CP012712.1 |                                 |                            |
|-----|---------|-------------------------------------------------------|---------------------------------|----------------------------|--------------------------------------------------------------------|---------------------------------|----------------------------|
|     |         | Query cover (%)                                       | Number of identical amino-acids | % of identical amino-acids | Query cover (%)                                                    | Number of identical amino-acids | % of identical amino-acids |
| 1   | ChoD    | 6.7                                                   | 16                              | 2.7                        | 5.7                                                                | 16                              | 2.7                        |
| 2   | Ltp4    | 6.5                                                   | 12                              | 3.4                        | 9.6                                                                | 12                              | 3.4                        |
| 3   | Ltp3    | 22.1                                                  | 24                              | 6.0                        | 18.5                                                               | 24                              | 6.1                        |
| 4   | Hsd4A   | 50.1                                                  | 75                              | 23.6                       | 49.5                                                               | 68                              | 21.4                       |

|           |        |      |     |             |      |     |             |
|-----------|--------|------|-----|-------------|------|-----|-------------|
| <b>5</b>  | FadE26 | 73.0 | 101 | <b>25.2</b> | 73.0 | 95  | <b>23.7</b> |
| <b>6</b>  | FadE27 | 76.1 | 83  | <b>22.2</b> | 76.1 | 82  | <b>22.0</b> |
| <b>7</b>  | FadD17 | 87.8 | 125 | <b>24.9</b> | 70.3 | 106 | <b>21.1</b> |
| <b>8</b>  | EchA19 | 92.0 | 92  | <b>35.0</b> | 92.0 | 83  | <b>31.6</b> |
| <b>9</b>  | KshA   | 11.4 | 18  | <b>4.7</b>  | 19.7 | 22  | <b>5.7</b>  |
| <b>10</b> | HsaF   | 25.1 | 27  | <b>7.8</b>  | 93.9 | 167 | <b>48.3</b> |
| <b>11</b> | HsaE   | 27.6 | 24  | <b>9.2</b>  | 96.5 | 109 | <b>41.8</b> |
| <b>12</b> | KstD   | 0    | 0   | <b>0</b>    | 0    | 0   | <b>0</b>    |
| <b>13</b> | FadE29 | 85.2 | 113 | <b>29.2</b> | 89.1 | 111 | <b>28.7</b> |
| <b>14</b> | FadE28 | 91.4 | 97  | <b>28.6</b> | 98.5 | 88  | <b>26.0</b> |
| <b>15</b> | Cyp125 | 9.0  | 15  | <b>3.4</b>  | 12.2 | 18  | <b>4.2</b>  |
| <b>16</b> | FadA5  | 95.9 | 184 | <b>47.1</b> | 96.2 | 177 | <b>45.3</b> |
| <b>17</b> | EchA20 | 78.5 | 70  | <b>28.3</b> | 93.9 | 69  | <b>27.9</b> |
| <b>18</b> | FadE30 | 83.6 | 105 | <b>27.3</b> | 85.7 | 103 | <b>26.7</b> |
| <b>19</b> | FadD3  | 98.4 | 178 | <b>35.1</b> | 98.4 | 172 | <b>33.9</b> |
| <b>20</b> | HsaB   | 80.7 | 55  | <b>29.4</b> | 78.6 | 52  | <b>27.8</b> |
| <b>21</b> | HsaC   | 86.3 | 74  | <b>24.7</b> | 28.7 | 26  | <b>8.7</b>  |
| <b>22</b> | HsaD   | 86.6 | 71  | <b>24.4</b> | 92.8 | 91  | <b>31.2</b> |
| <b>23</b> | HsaA   | 84.0 | 79  | <b>20.0</b> | 82.7 | 83  | <b>21.1</b> |

|           |        |      |     |             |      |     |             |
|-----------|--------|------|-----|-------------|------|-----|-------------|
| <b>24</b> | KshB   | 54.2 | 63  | <b>17.6</b> | 60.0 | 73  | <b>20.4</b> |
| <b>25</b> | IpdB   | 6.0  | 32  | <b>12.8</b> | 15.2 | 14  | <b>5.6</b>  |
| <b>26</b> | ChsH1  | 12.4 | 46  | <b>35.7</b> | 25.6 | 15  | <b>11.6</b> |
| <b>27</b> | ChsH2  | 31.5 | 28  | <b>9.0</b>  | 21.9 | 25  | <b>8.0</b>  |
| <b>28</b> | FadD19 | 87.2 | 161 | <b>29.3</b> | 87.6 | 166 | <b>30.2</b> |
| <b>29</b> | Hsd4B  | 31.8 | 27  | <b>9.4</b>  | 31.8 | 26  | <b>9.1</b>  |
