# Supplementary material for: Steroid Metabolism in Thermophilic Actinobacterium Saccharopolyspora hirsuta VKM Ac-666T
Source: MDPI journal article supplement (doi:10.3390/microorganisms9122554), 2021-12-10
Supplement: s1 [file s1]

## Supporting materials

**article title:** Steroid Metabolism in Thermophilic Actinobacteria *Saccharopolyspora hirsuta* VKM Ac-666<sup>T</sup>

**journal name:** Microorganisms

**author names:** Tatyana Lobastova, Victoria Fokina, Sergey Tarlachkov, Andrey Shutov, Eugeny Bragin, Alexey Kazantsev, Marina Donova

**\*Correspondence:** 2vvfokina@gmail.com

### Table of contents

| No. | Figure Capture                                                                                                                                                                                                                                              | Page |
|-----|-------------------------------------------------------------------------------------------------------------------------------------------------------------------------------------------------------------------------------------------------------------|------|
| S1  | Figure S1 HPLC-profile (mobile phase acetonitrile:2-propanol:water (50:45:5 v/v/v)) of cholesterol (standard), $\lambda$ (200 nm)                                                                                                                           | 5    |
| S2  | Figure S2 HPLC-profile (mobile phase acetonitrile:2-propanol:water (50:45:5 v/v/v)) of cholest-4-en-3-one (cholestenone) (standard), $\lambda$ (240 nm)                                                                                                     | 6    |
| S3  | Figure S3 HPLC-profile (mobile phase acetonitrile:2-propanol:water (50:45:5 v/v/v)) of the individual compound isolated from the transformation media at the cholesterol conversion by <i>S.hirsuta</i> : cholest-4-en-3-one (II), $\lambda$ (240 nm)       | 7    |
| S4  | Figure S4 HPLC-profile (mobile phase acetonitrile:2-propanol:water (50:45:5 v/v/v)) of the individual compound isolated from the transformation media at the cholesterol conversion by <i>S.hirsuta</i> : cholesta-1,4-dien-3-one (III), $\lambda$ (240 nm) | 8    |

|     |                                                                                                                                                                                                                                                                                    |    |
|-----|------------------------------------------------------------------------------------------------------------------------------------------------------------------------------------------------------------------------------------------------------------------------------------|----|
| S5  | Figure S5 HPLC-profile (mobile phase acetonitrile:2-propanol:water (50:45:5 v/v/v))<br>of the individual compound isolated from the transformation media at the cholesterol conversion by <i>S.hirsuta</i> : 26-hydroxycholest-4-en-3-one (IV), $\lambda$ (240 nm)                 | 9  |
| S6  | Figure S6 HPLC-profile (mobile phase acetonitrile:2-propanol:water (50:45:5 v/v/v))<br>of the individual compound isolated from the transformation media at the cholesterol conversion by <i>S.hirsuta</i> : 3-oxo-cholest-4-en-26-oic acid (V), $\lambda$ (240 nm)                | 10 |
| S7  | Figure S7 HPLC-profile (mobile phase acetonitrile:2-propanol:water (50:45:5 v/v/v))<br>of the individual compound isolated from the transformation media at the cholesterol conversion by <i>S.hirsuta</i> : 3-oxo-cholesta-1,4-dien-26-oic acid (VI), $\lambda$ (240 nm)          | 11 |
| S8  | Figure S8 HPLC-profile (mobile phase acetonitrile:2-propanol:water (50:45:5 v/v/v))<br>of the individual compound isolated from the transformation media at the cholesterol conversion by <i>S.hirsuta</i> : 26-hydroxycholesterol (VII), $\lambda$ (200 nm)                       | 12 |
| S9  | Figure S9 HPLC-profile (mobile phase acetonitrile:2-propanol:water (50:45:5 v/v/v))<br>of the individual compound isolated from the transformation media at the cholesterol conversion by <i>S.hirsuta</i> : 3 $\beta$ -hydroxycholest-5-en-26-oic acid (VIII), $\lambda$ (200 nm) | 13 |
| S10 | Figure S10 HPLC-profile (mobile phase acetonitrile:water:acetic acid (60:40:0.01 v/v/v))<br>of the individual compound isolated from the transformation media at the cholesterol conversion by <i>S.hirsuta</i> : 26-hydroxycholest-4-en-3-one (IV), $\lambda$ (240 nm)            | 14 |

|     |                                                                                                                                                                                                                                                                                         |    |
|-----|-----------------------------------------------------------------------------------------------------------------------------------------------------------------------------------------------------------------------------------------------------------------------------------------|----|
| S11 | Figure S11 HPLC-profile (mobile phase acetonitrile:water:acetic acid (60:40:0.01 v/v/v))<br>of the individual compound isolated from the transformation media at the cholesterol conversion by <i>S.hirsuta</i> : 3-oxo-cholest-4-en-26-oic acid (V), $\lambda$ (240 nm)                | 15 |
| S12 | Figure S12 HPLC-profile (mobile phase acetonitrile:water:acetic acid (60:40:0.01 v/v/v))<br>of the individual compound isolated from the transformation media at the cholesterol conversion by <i>S.hirsuta</i> : 3-oxo-cholesta-1,4-dien-26-oic acid (VI), $\lambda$ (240 nm)          | 16 |
| S13 | Figure S13 HPLC-profile (mobile phase acetonitrile:water:acetic acid (60:40:0.01 v/v/v))<br>of the individual compound isolated from the transformation media at the cholesterol conversion by <i>S.hirsuta</i> : 26-hydroxycholesterol (VII), $\lambda$ (200 nm)                       | 17 |
| S14 | Figure S14 HPLC-profile (mobile phase acetonitrile:water:acetic acid (60:40:0.01 v/v/v))<br>of the individual compound isolated from the transformation media at the cholesterol conversion by <i>S.hirsuta</i> : 3 $\beta$ -hydroxycholest-5-en-26-oic acid (VIII), $\lambda$ (200 nm) | 18 |
| S15 | Figure S15 Mass spectrum $[M+H]^+$ of cholest-4-en-3-one (384) (II)                                                                                                                                                                                                                     | 19 |
| S16 | Figure S16 Mass spectrum $[M+H]^+$ of cholesta-1,4-dien-3-one (382) (III), (collision energy 33 eV)                                                                                                                                                                                     | 19 |
| S17 | Figure S17 Mass spectrum $[M+H]^+$ of 26-hydroxy-cholest-4-en-3-one (400) (IV)                                                                                                                                                                                                          | 20 |
| S18 | Figure S18 Mass spectrum $[M-H]^+$ of 3-oxo-cholest-4-en-26-oic acid (414) (V)                                                                                                                                                                                                          | 21 |
| S19 | Figure S19 Mass spectrum $[M-H]^+$ of 3-oxo-cholesta-1,4-dien-26-oic acid (412) (VI)                                                                                                                                                                                                    | 22 |
| S20 | Figure S20 Mass spectrum $[M-H]^+$ of 26-hydroxycholesterol (402) (VII)                                                                                                                                                                                                                 | 23 |

|     |                                                                                                                    |    |
|-----|--------------------------------------------------------------------------------------------------------------------|----|
| S21 | Figure S21 Mass spectrum $[M-H]^+$ of 3 $\beta$ -hydroxycholest-5-en-26-oic acid (416) (VIII)                      | 24 |
| S22 | Figure S22 $^1H$ -NMR spectrum of 26-hydroxycholest-4-en-3-one (IV)                                                | 25 |
| S23 | Figure S23 $^1H$ -NMR spectrum of 3-oxo-cholest-4-en-26-oic acid (V)                                               | 26 |
| S24 | Figure S24 $^{13}C$ -NMR spectrum of 3-oxo-cholest-4-en-26-oic acid (V)                                            | 27 |
| S25 | Figure S25 $^1H$ -NMR spectrum of 3-oxo-cholesta-1,4-dien-26-oic acid (VI)                                         | 28 |
| S26 | Figure S26 $^{13}C$ -NMR spectrum of 3-oxo-cholesta-1,4-dien-26-oic acid (VI)                                      | 29 |
| S27 | Figure S27 $^1H$ -NMR spectrum of 26-hydroxycholesterol (VII)                                                      | 30 |
| S28 | Figure S28 $^{13}C$ -NMR spectrum of 26-hydroxycholesterol (VII)                                                   | 31 |
| S29 | Figure S29 $^1H$ -NMR spectrum of 3 $\beta$ -hydroxycholest-5-en-26-oic acid (VIII)                                | 32 |
| S30 | Figure S30 $^{13}C$ -NMR spectrum of 3 $\beta$ -hydroxycholest-5-en-26-oic acid (VIII)                             | 33 |
| S31 | Figure S31 Bioconversion of lithocholic acid by <i>S.hirsuta</i> VKM Ac-666 <sup>T</sup> under the conditions used | 34 |

**Figure S1. HPLC-profile (mobile phase acetonitrile:2-propanol:water (50:45:5 v/v/v/))**

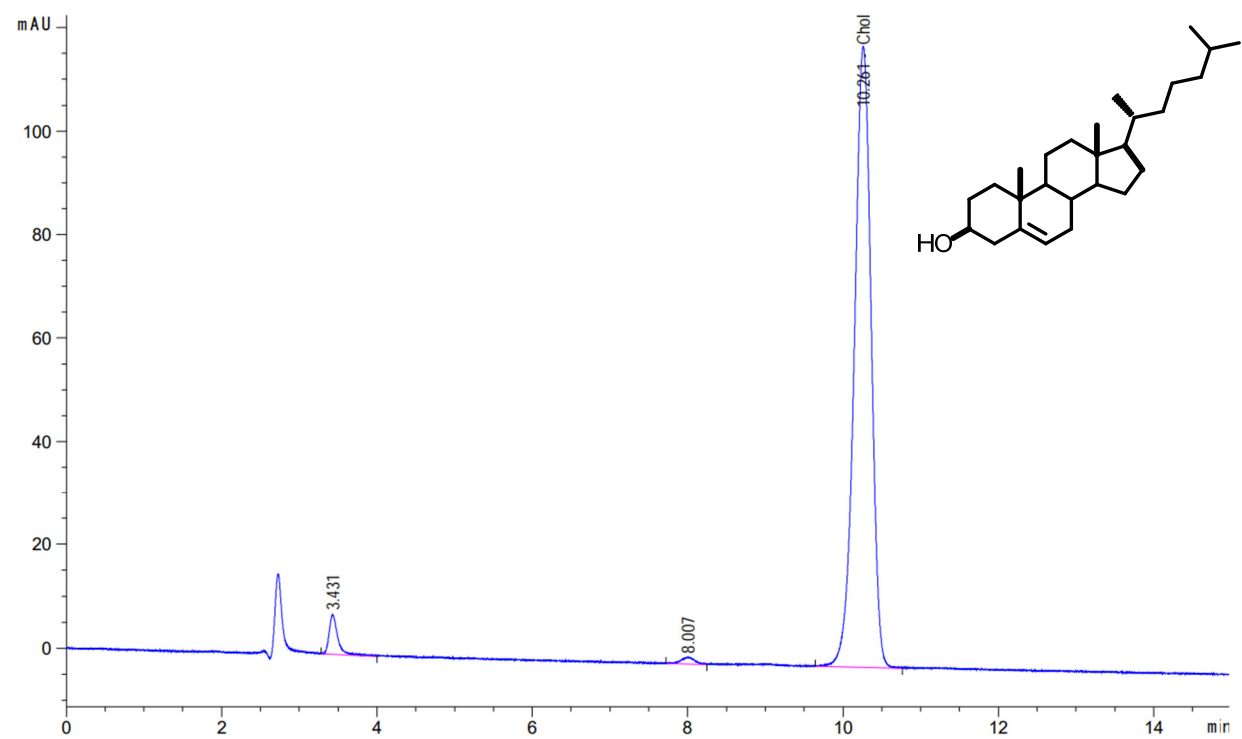

Cholesterol (standard),  $\lambda(200\text{ nm})$

**Figure S2. HPLC-profile (mobile phase acetonitrile:2-propanol:water (50:45:5 v/v/v/))**

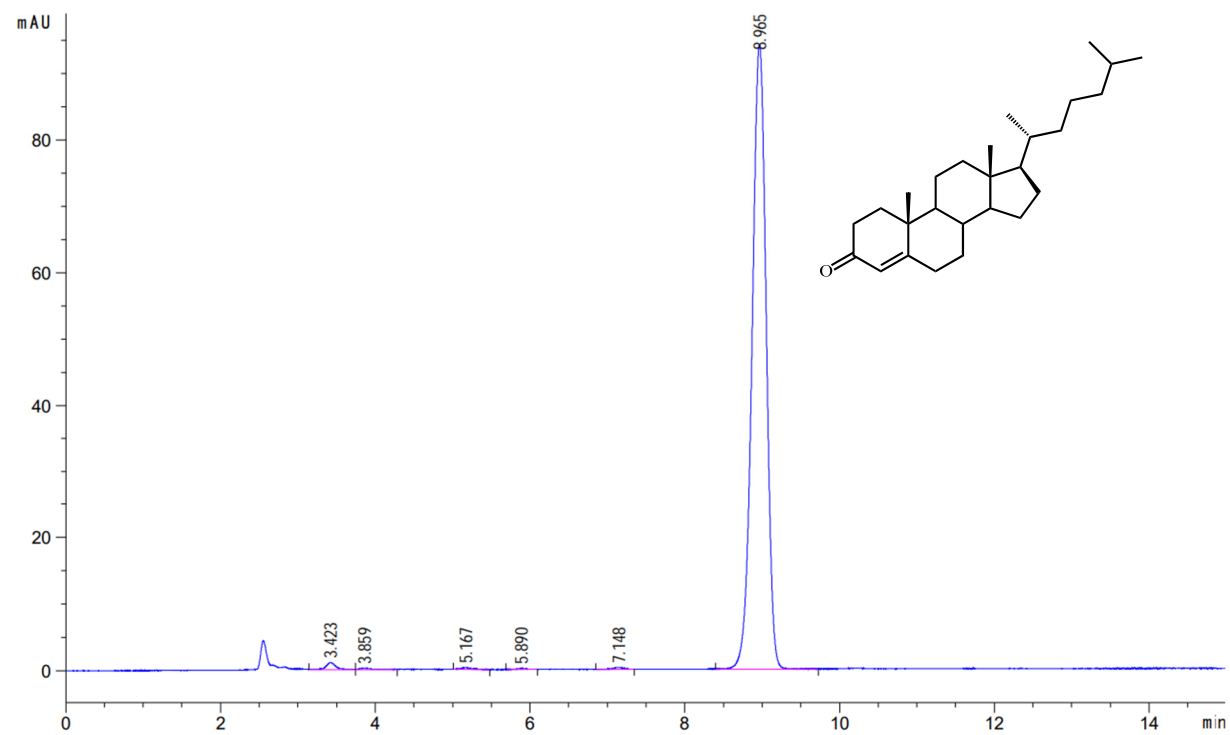

Cholest-4-en-3-one (cholestenone) (standard),  $\lambda$  (240 nm)

**Figure S3. HPLC-profile (mobile phase acetonitrile:2-propanol:water (50:45:5 v/v/v))  
of the individual compound isolated from the transformation media at the cholesterol conversion by *S.hirsuta***

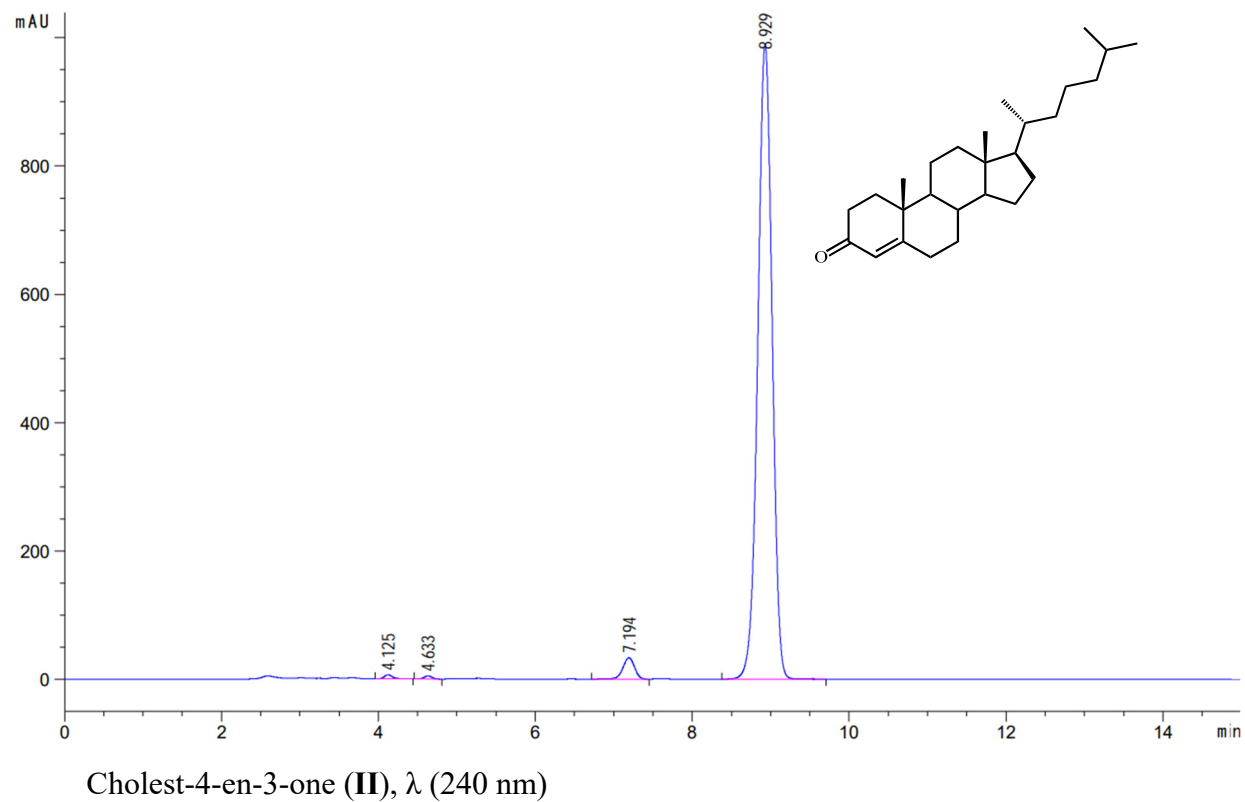

**Figure S4. HPLC-profile (mobile phase acetonitrile:2-propanol:water (50:45:5 v/v/v))  
of the individual compound isolated from the transformation media at the cholesterol conversion by *S.hirsuta***

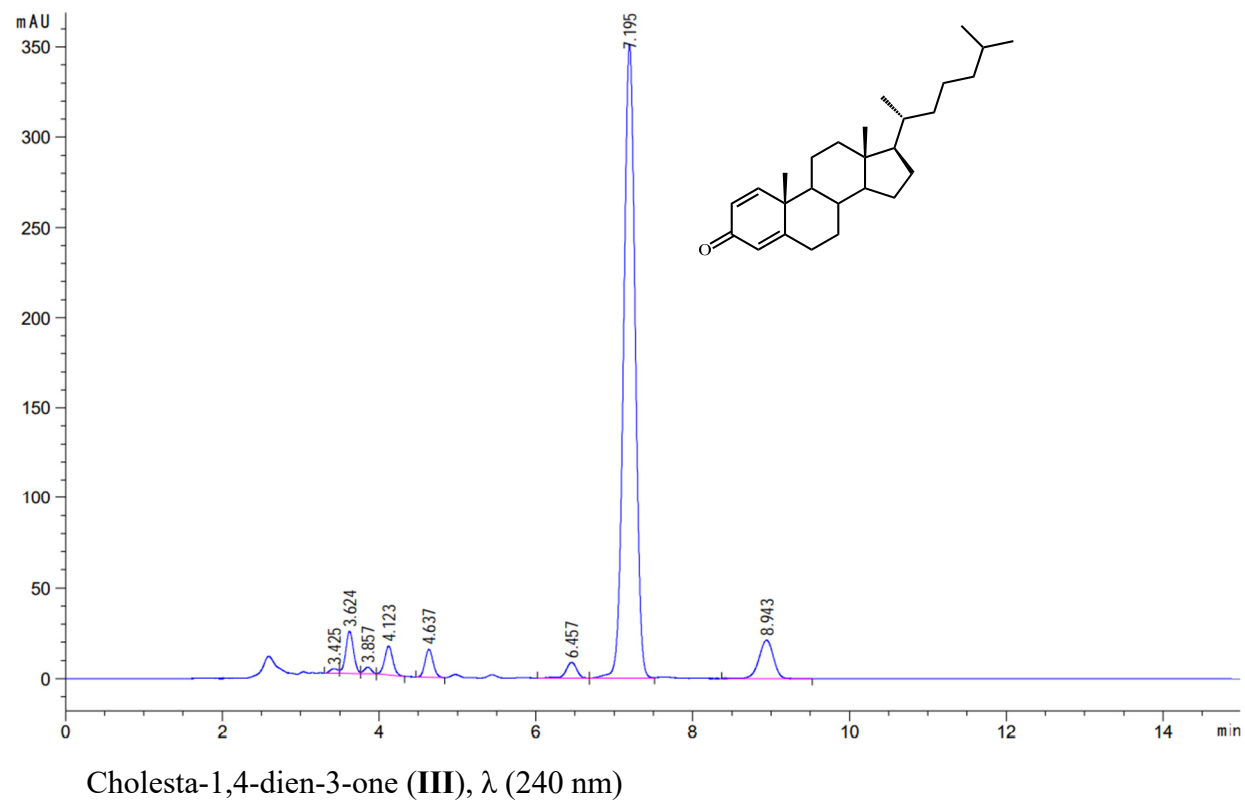



**Figure S5. HPLC-profile (mobile phase acetonitrile:2-propanol:water (50:45:5 v/v/v))  
of the individual compound isolated from the transformation media at the cholesterol conversion by *S.hirsuta***

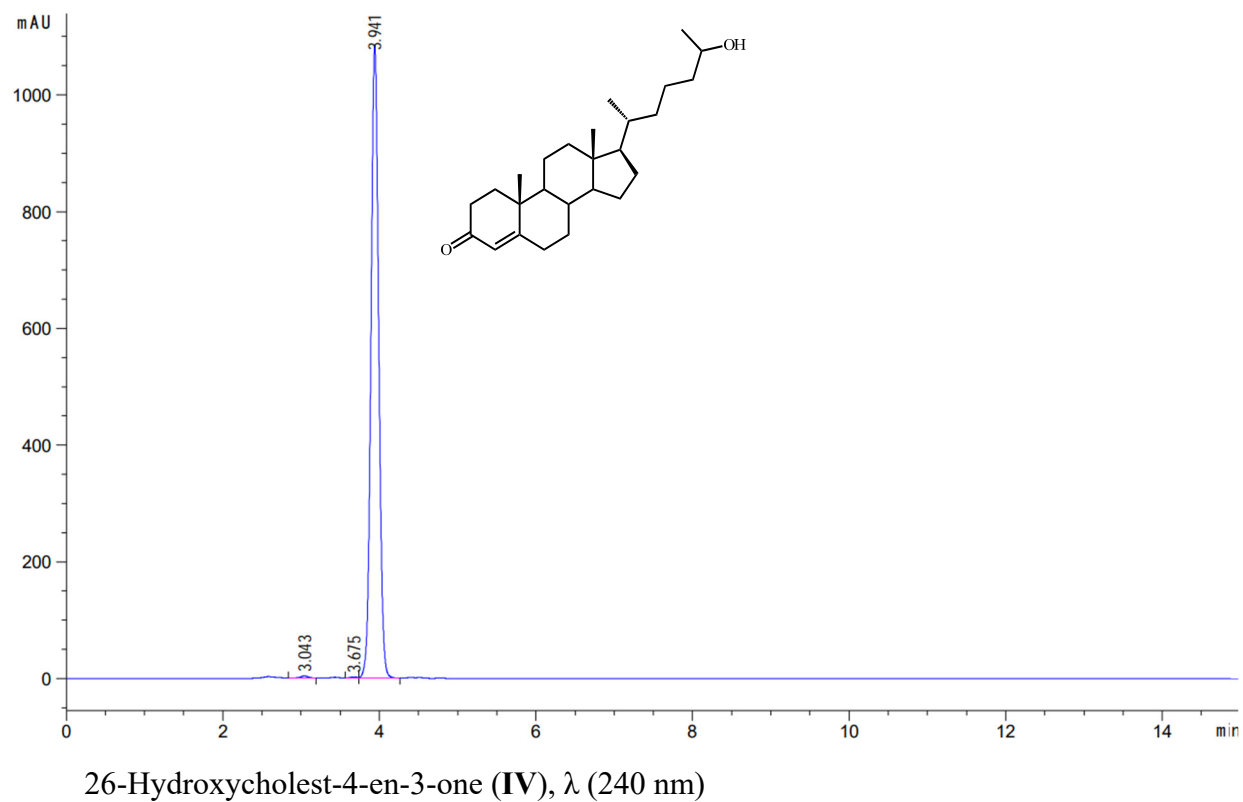

**Figure S6. HPLC-profile (mobile phase acetonitrile:2-propanol:water (50:45:5 v/v/v))  
of the individual compound isolated from the transformation media at the cholesterol conversion by *S.hirsuta***

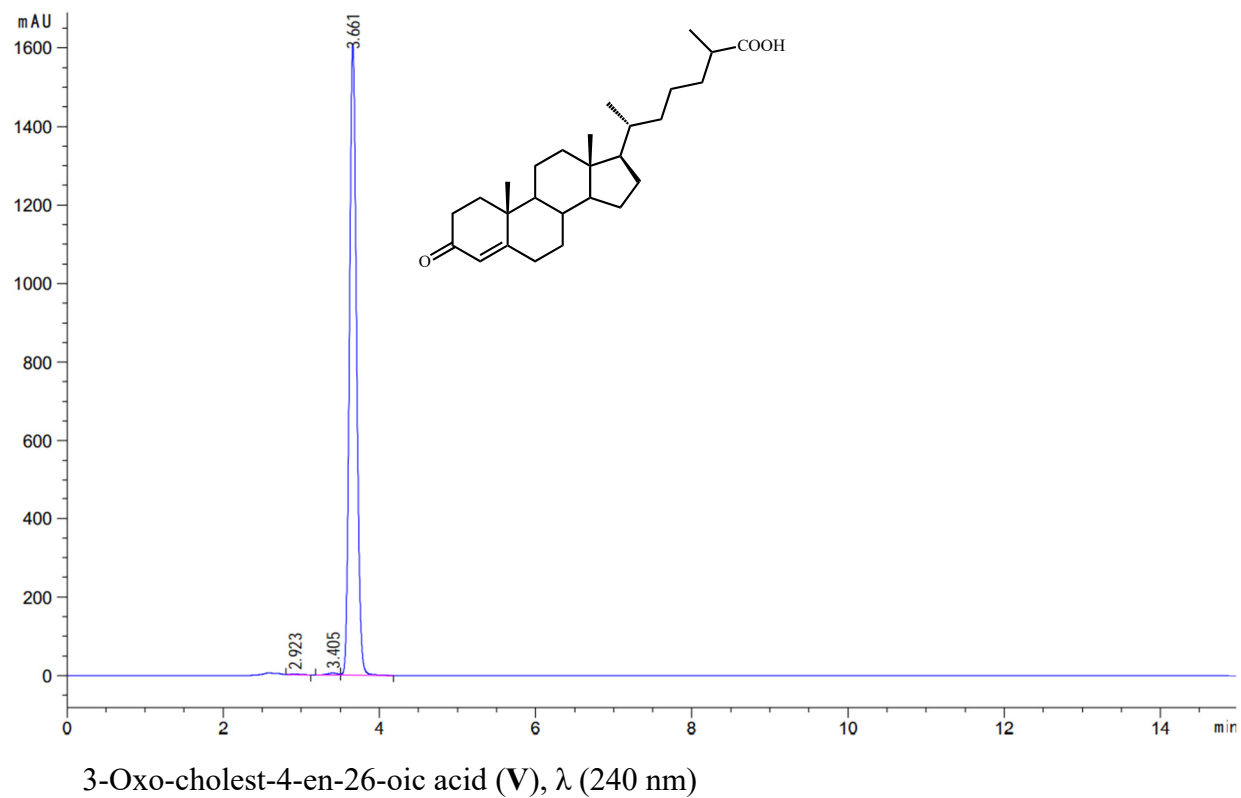

**Figure S7. HPLC-profile (mobile phase acetonitrile:2-propanol:water (50:45:5 v/v/v))  
of the individual compound isolated from the transformation media at the cholesterol conversion by *S.hirsuta***

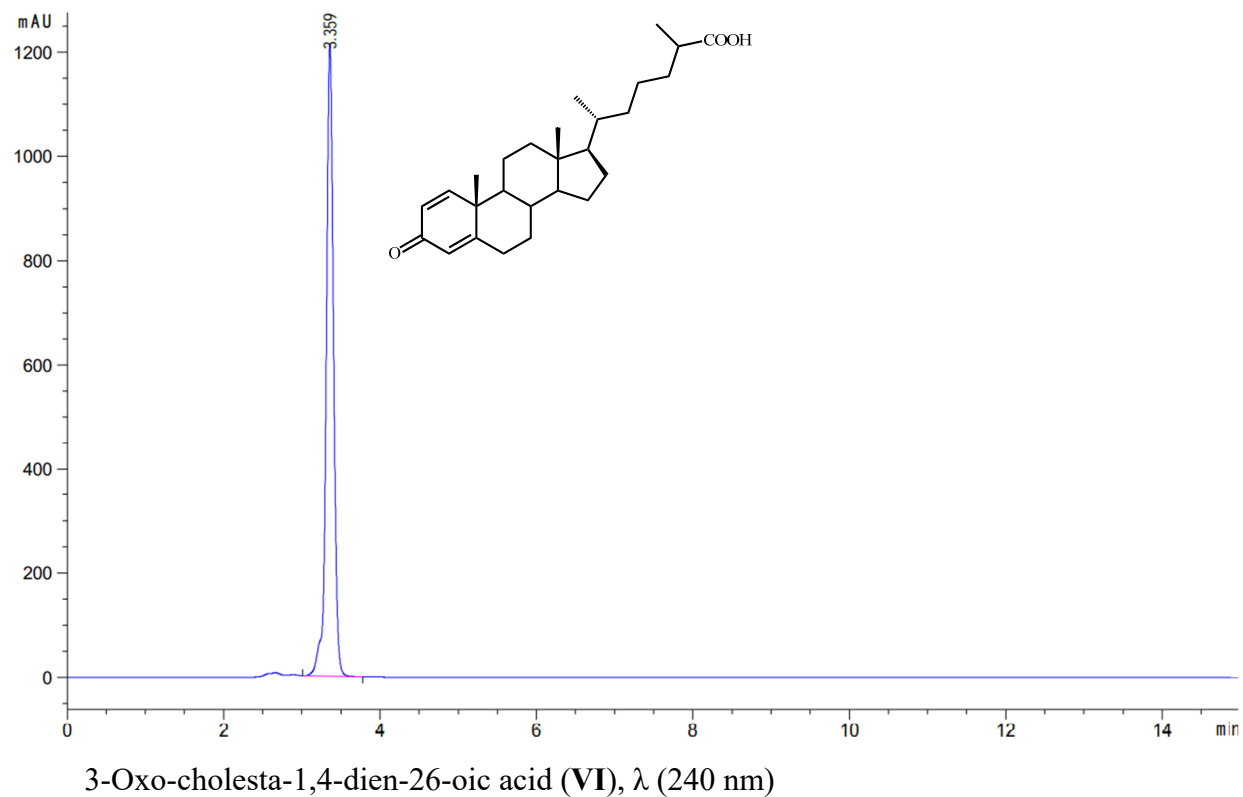

**Figure S8. HPLC-profile (mobile phase acetonitrile:2-propanol:water (50:45:5 v/v/v))  
of the individual compound isolated from the transformation media at the cholesterol conversion by *S.hirsuta***

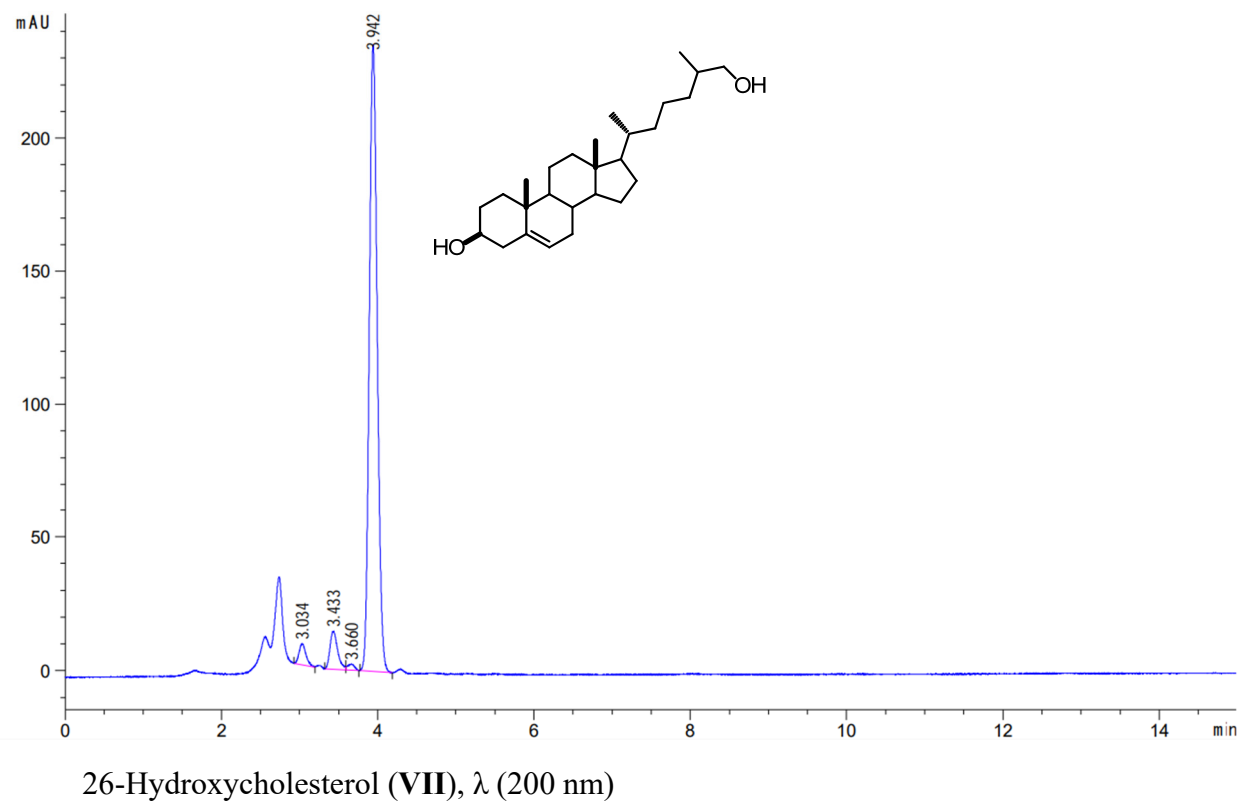

**Figure S9. HPLC-profile (mobile phase acetonitrile:2-propanol:water (50:45:5 v/v/v))  
of the individual compound isolated from the transformation media at the cholesterol conversion by *S.hirsuta***

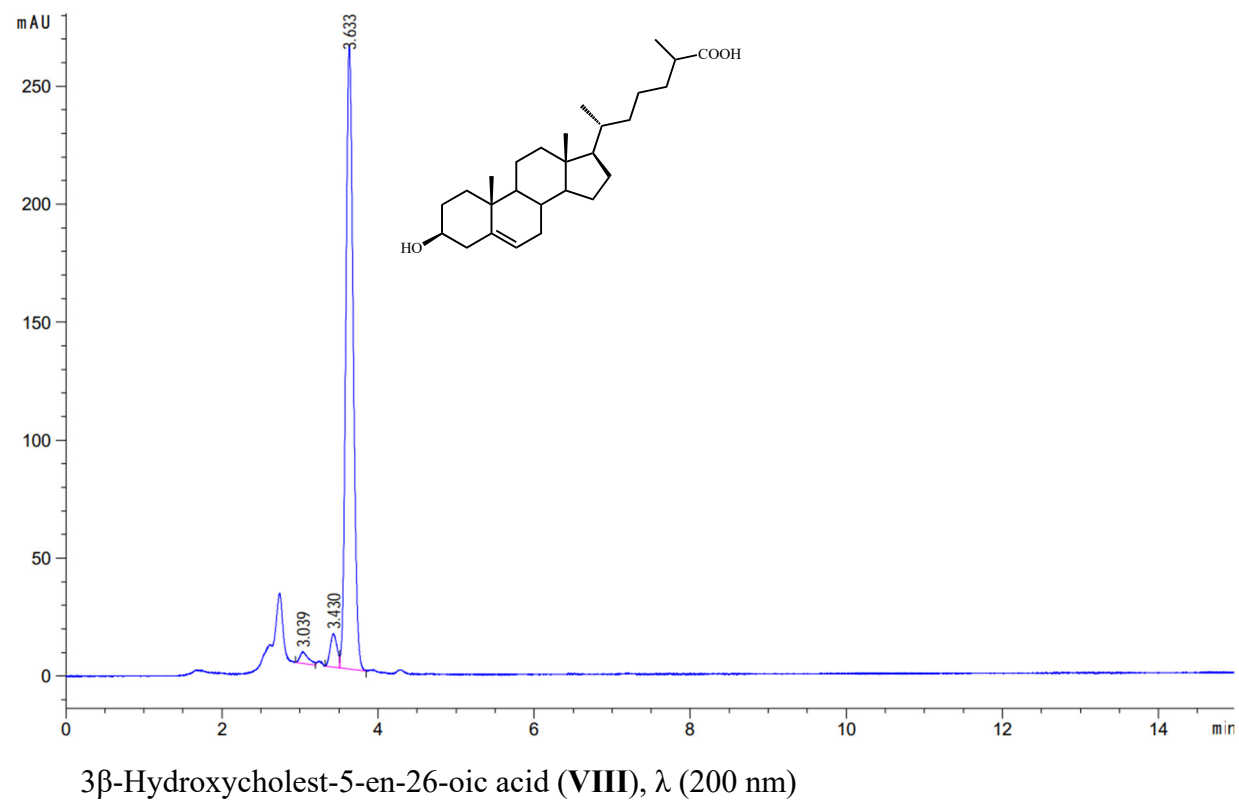

**Figure S10. HPLC-profile (mobile phase acetonitrile:water:acetic acid (60:40:0.01 v/v/v))  
of the individual compound isolated from the transformation media at the cholesterol conversion by *S.hirsuta***

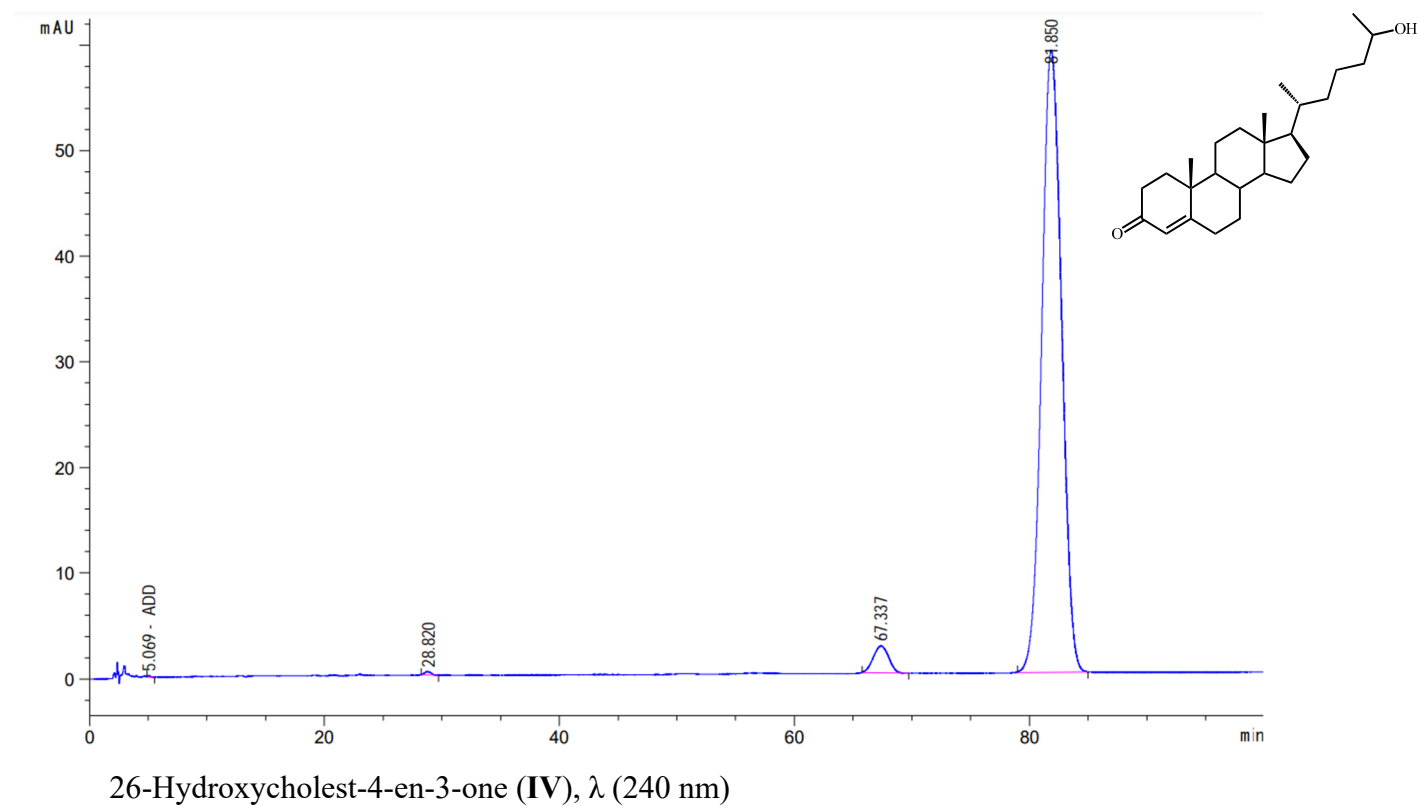

**Figure S11. HPLC-profile (mobile phase acetonitrile:water:acetic acid (60:40:0.01 v/v/v/))  
of the individual compound isolated from the transformation media at the cholesterol conversion by *S.hirsuta***

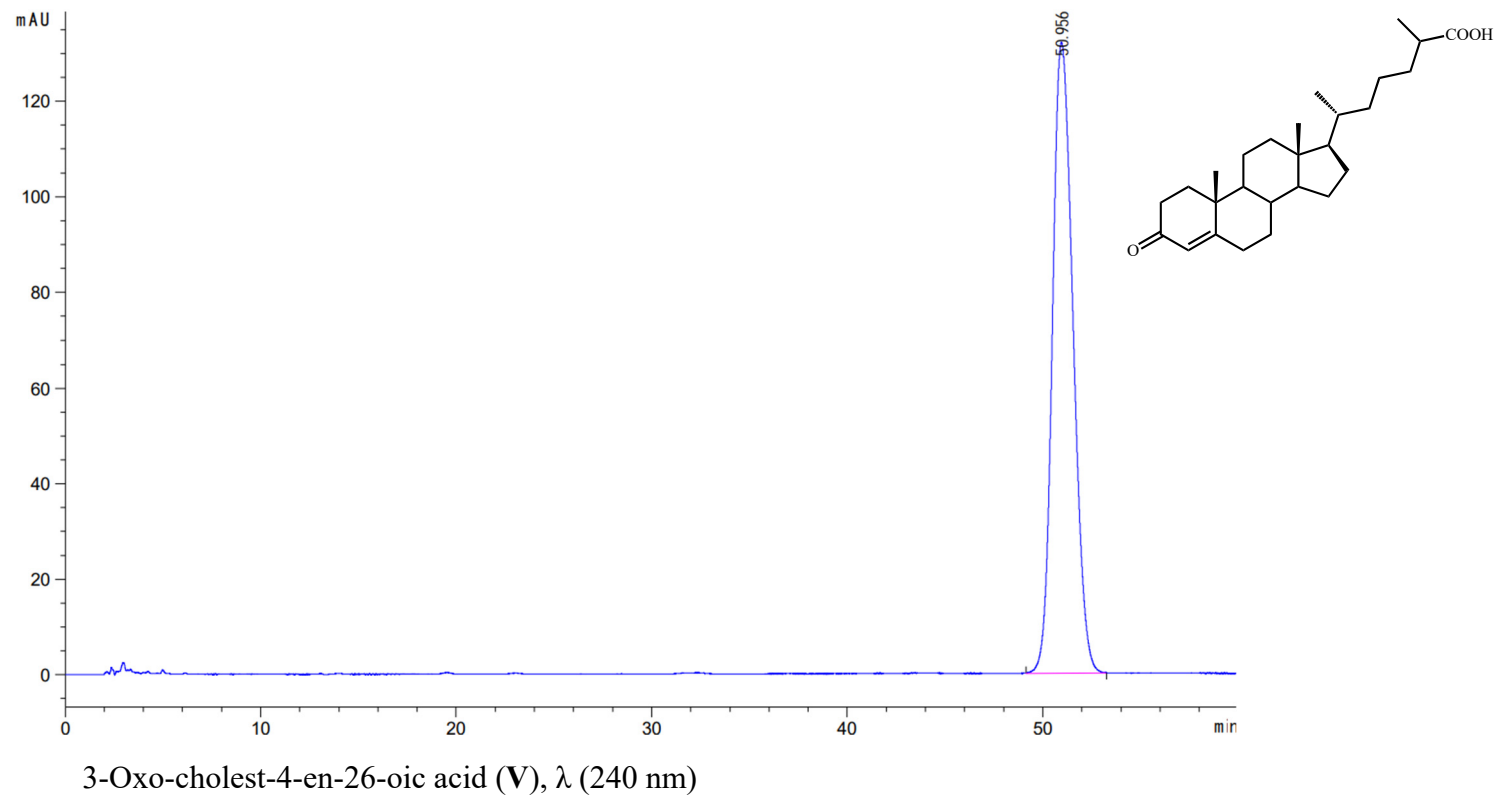

**Figure S12. HPLC-profile (mobile phase acetonitrile:water:acetic acid (60:40:0.01 v/v/v))  
of the individual compound isolated from the transformation media at the cholesterol conversion by *S.hirsuta***

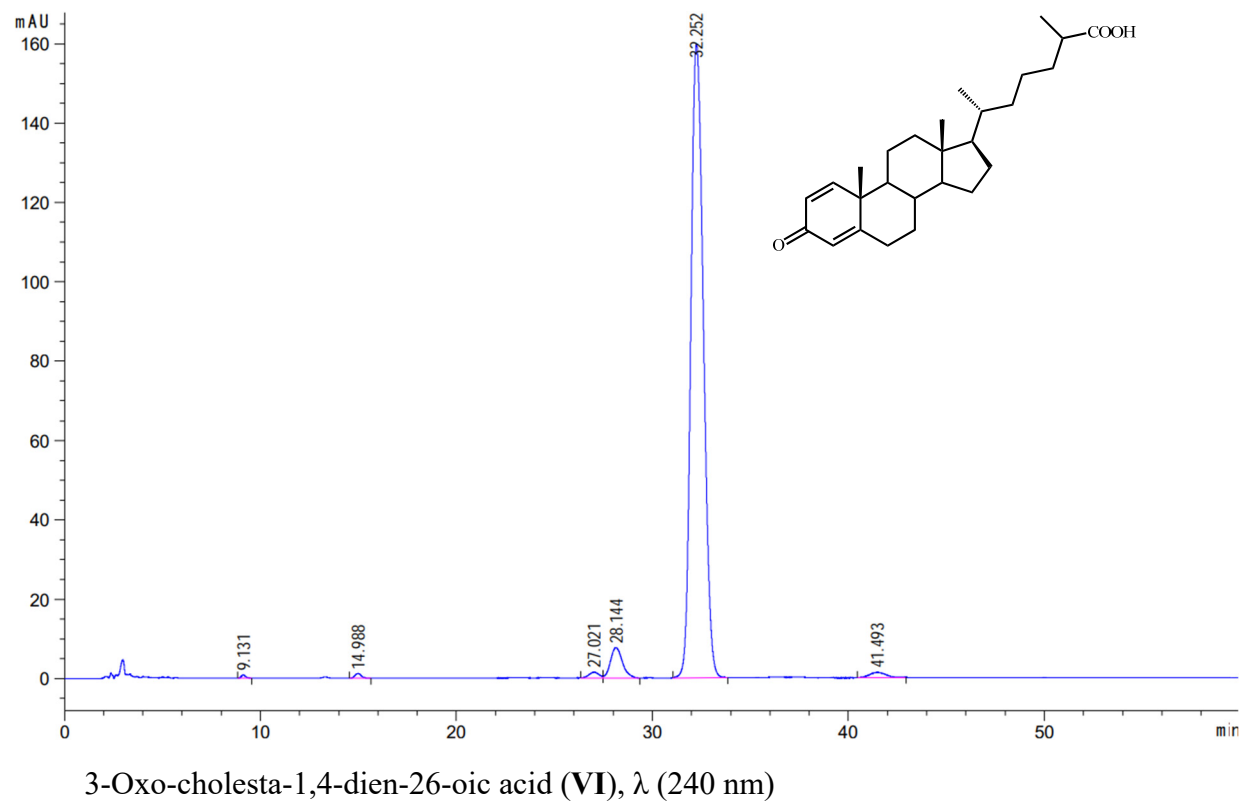



**Figure S13. HPLC-profile (mobile phase acetonitrile:water:acetic acid (60:40:0.01 v/v/v))  
of the individual compound isolated from the transformation media at the cholesterol conversion by *S.hirsuta***

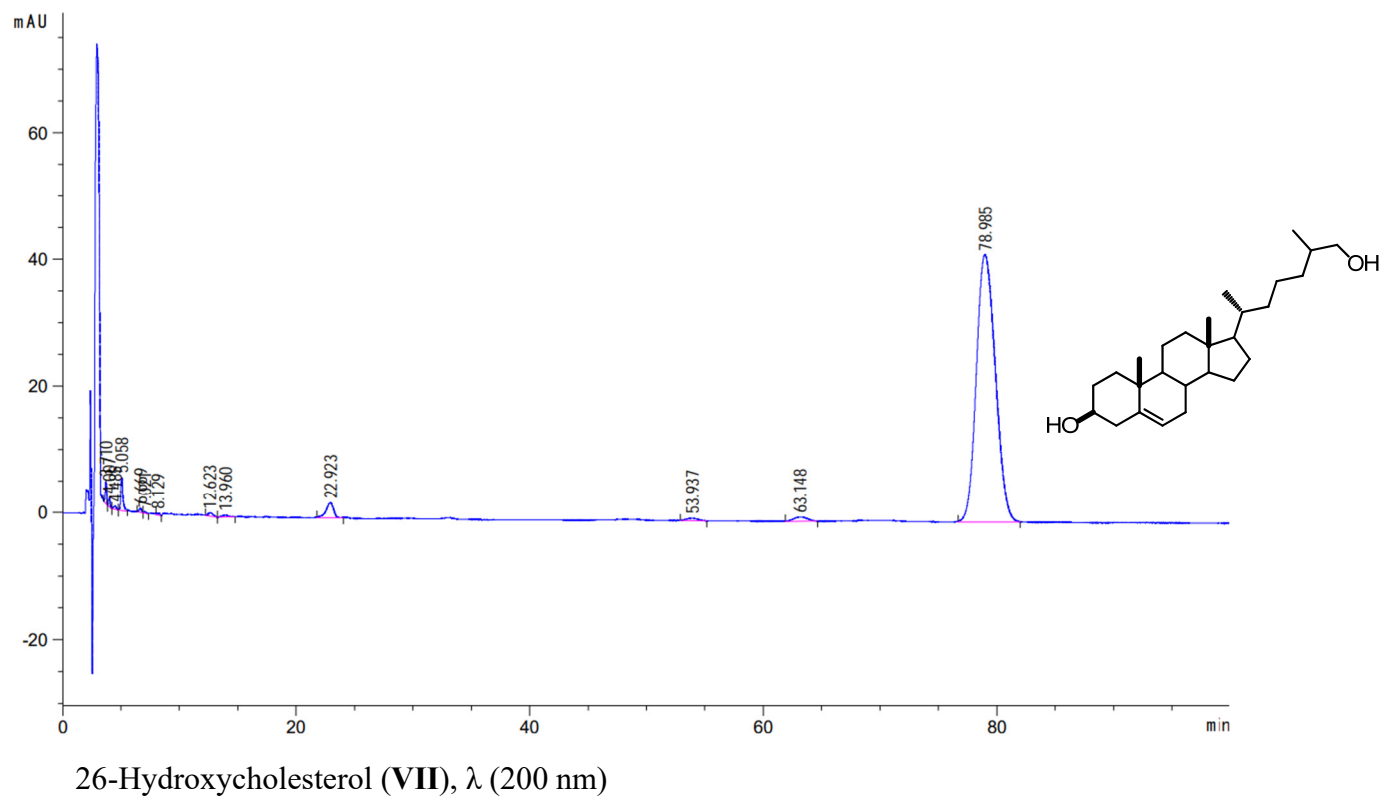

**Figure S14. HPLC-profile (mobile phase acetonitrile:water:acetic acid (60:40:0.01 v/v/v))  
of the individual compound isolated from the transformation media at the cholesterol conversion by *S.hirsuta***

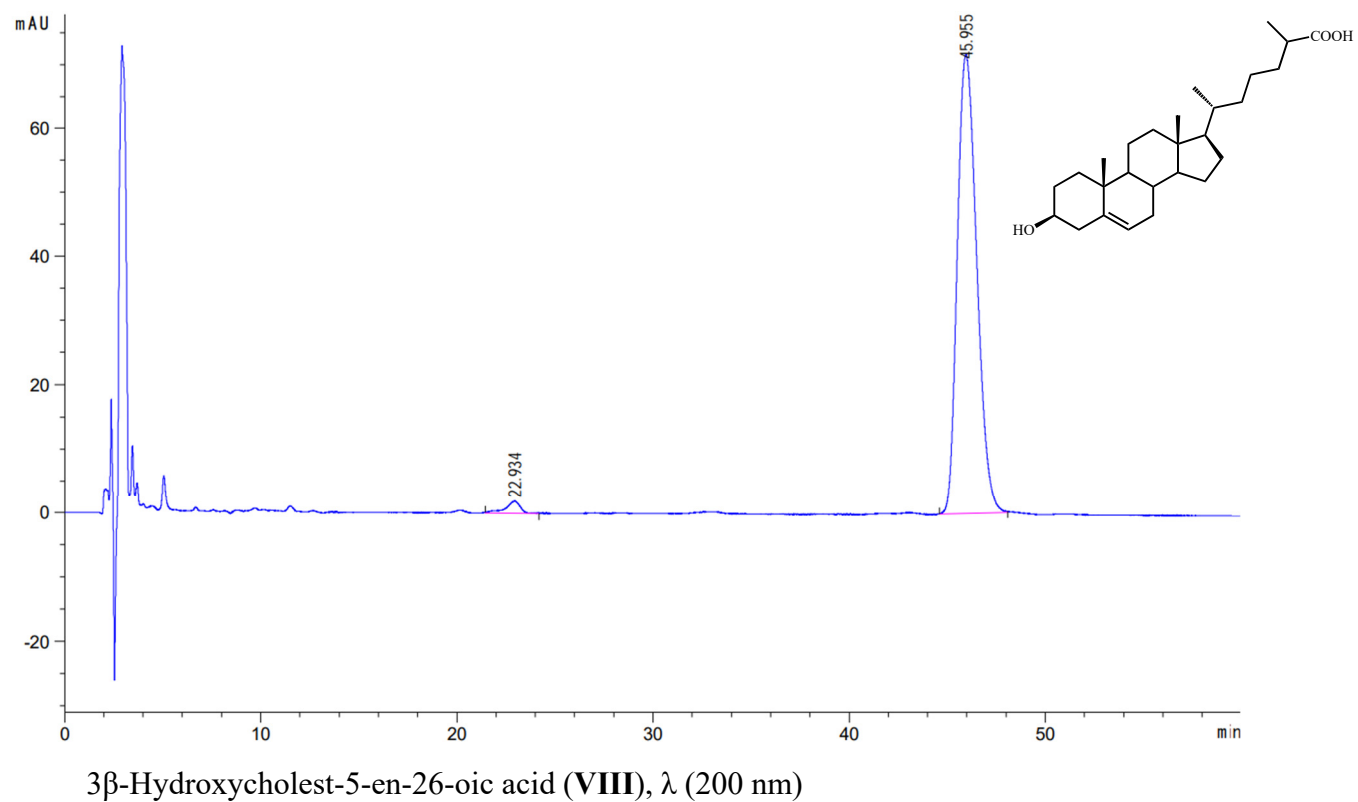

**Figure S15. Mass spectrum  $[M+H]^+$**

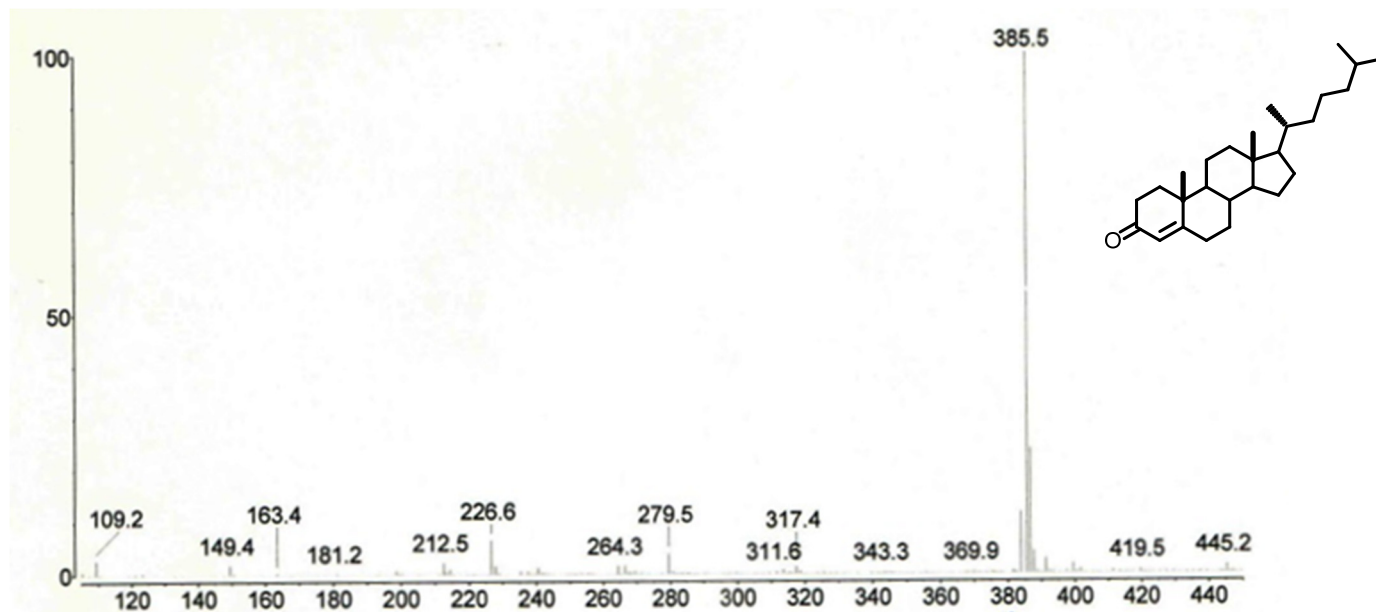

Cholest-4-en-3-one (384) (II)

**Figure S16. Mass spectrum  $[M+H]^+$**

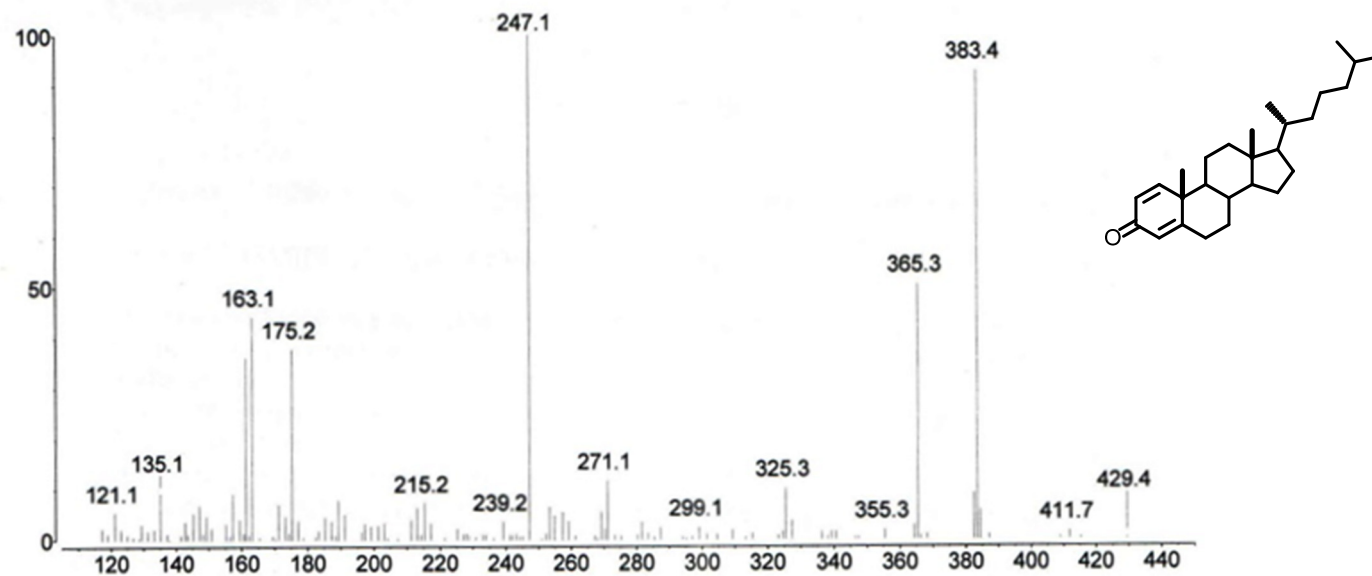

Cholesta-1,4-dien-3-one (**382**) (**III**), (collision energy 33 eV)

**Figure S17. Mass spectrum  $[M+H]^+$**

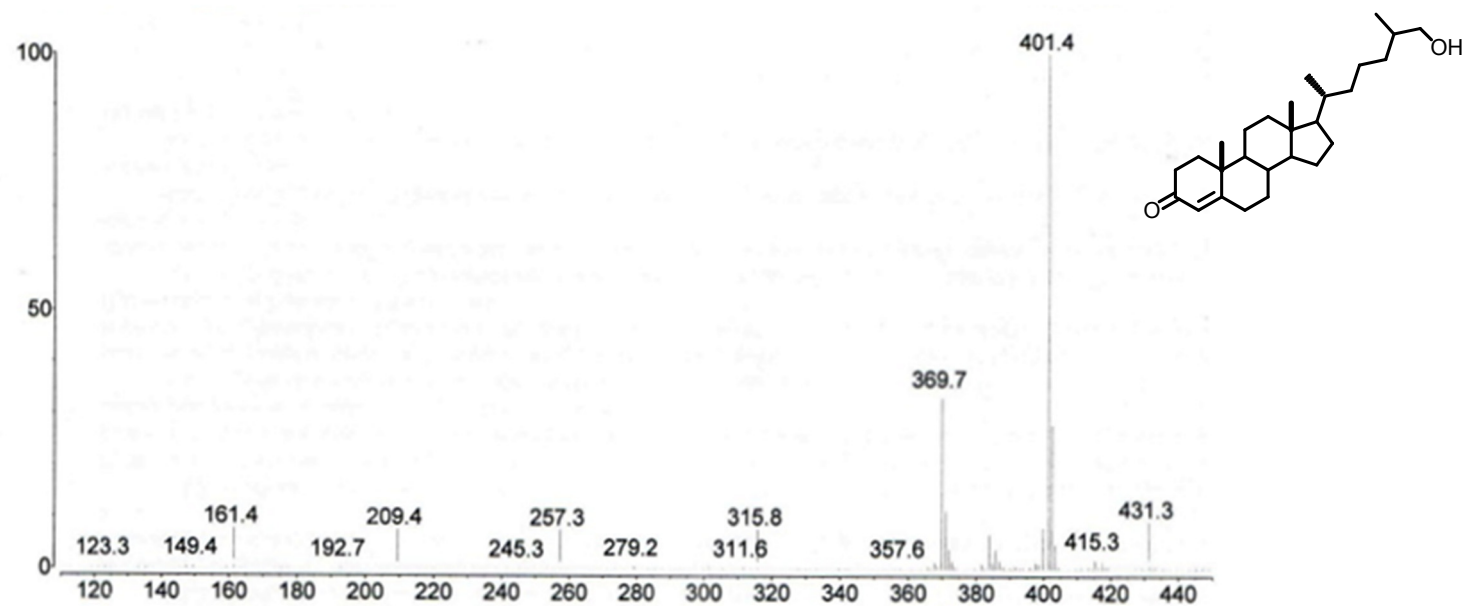

26-Hydroxy-cholest-4-en-3-one (**400**) (**IV**)

**Figure S18. Mass spectrum  $[M-H]^+$**

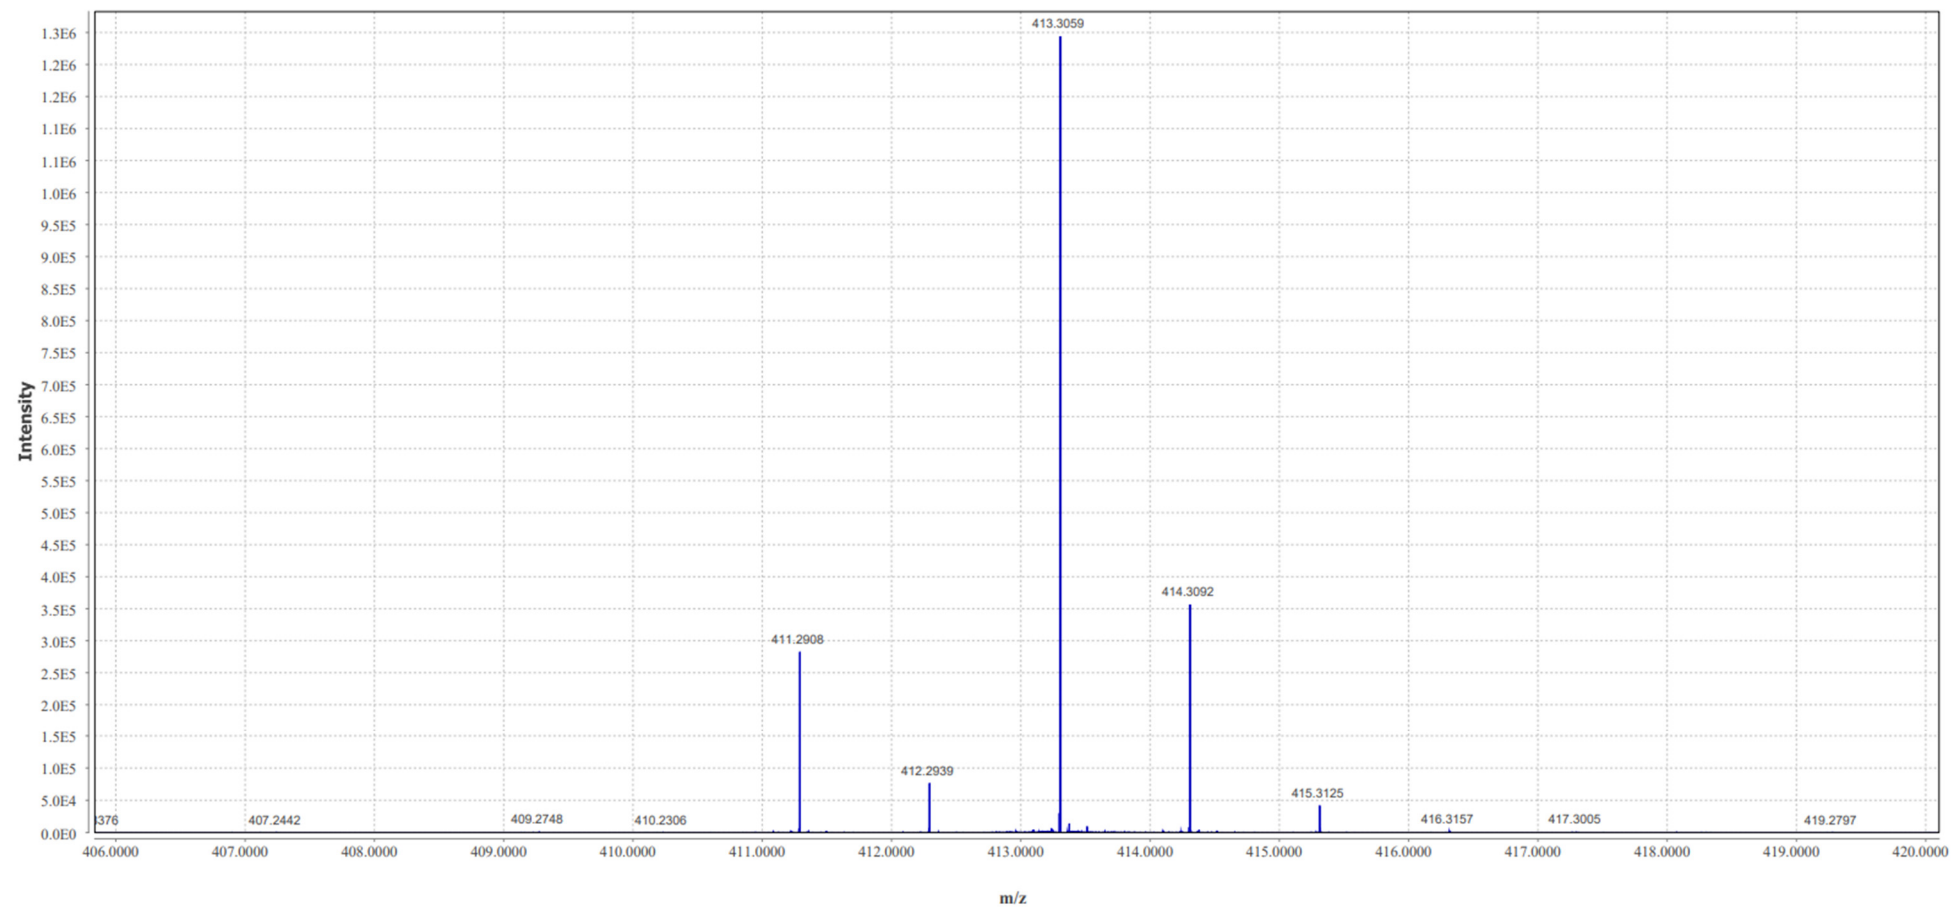

HRMS-ESI ( $m/z$ ):  $[M-H]^+$  calcd for  $C_{27}H_{41}O_3$  413,3056; found 413,3059

3-Oxo-cholest-4-en-26-oic acid (**414**) (V)

**Figure S19. Mass spectrum  $[M-H]^+$**

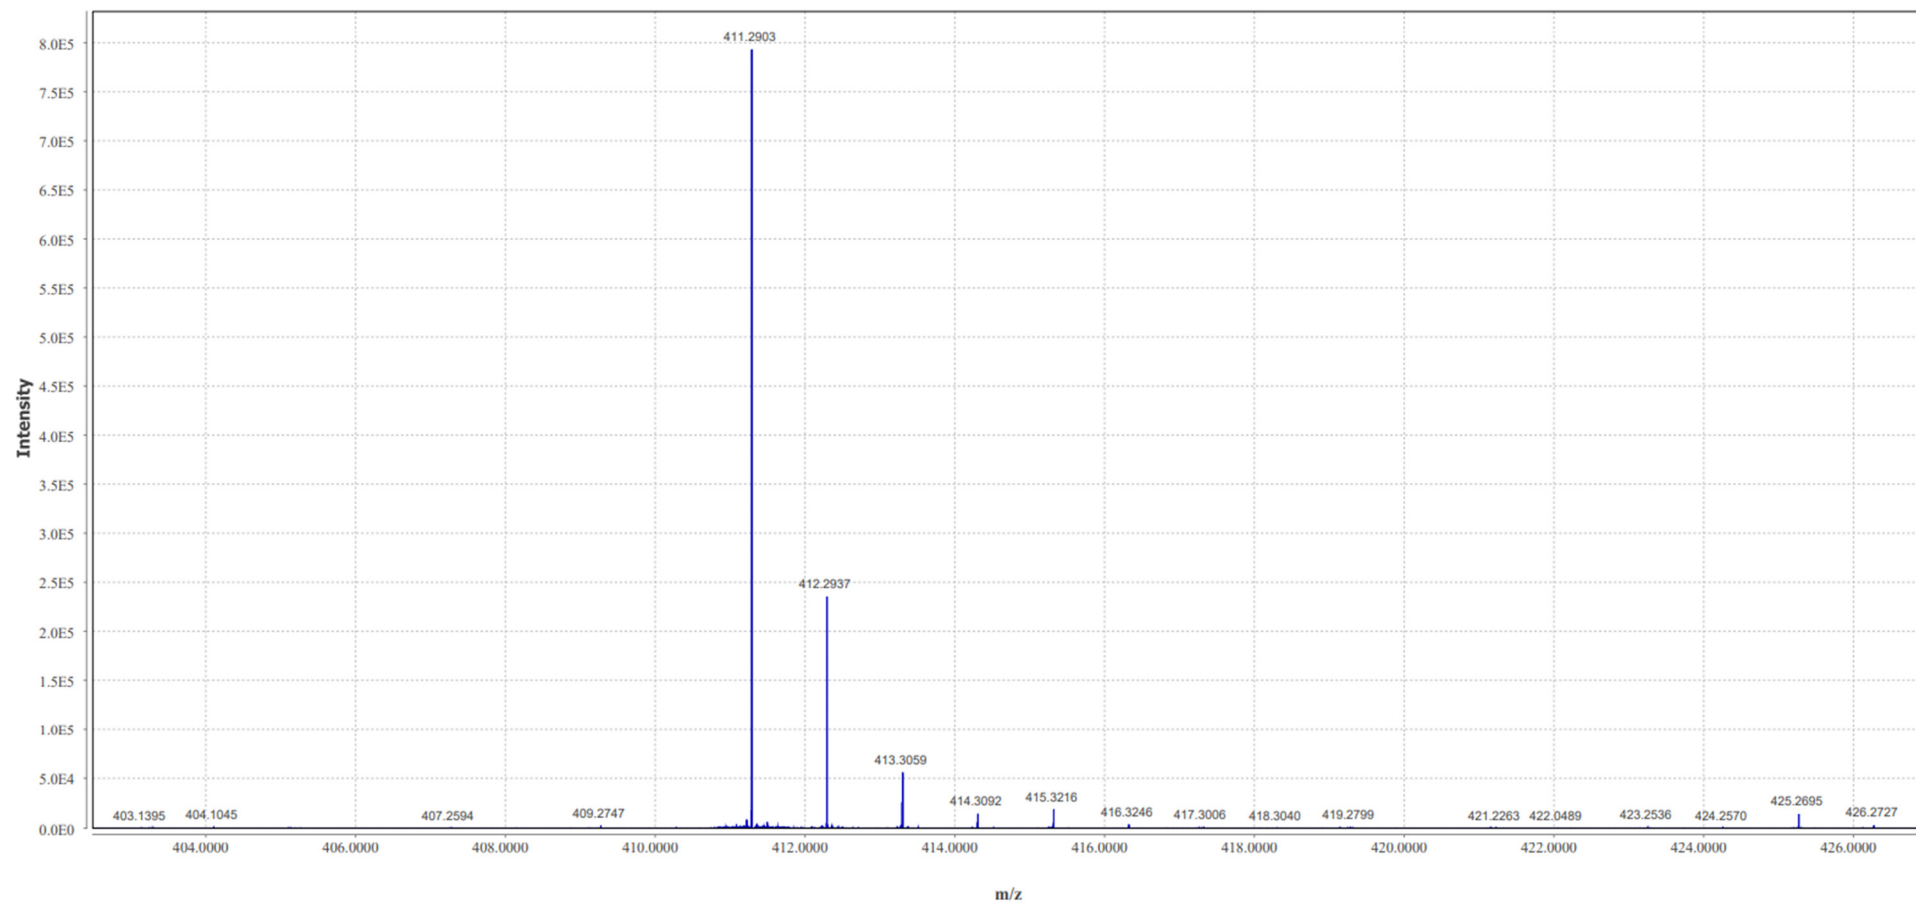

HRMS-ESI ( $m/z$ ):  $[M-H]^+$  calcd for  $C_{27}H_{39}O_3$  411,2899; found 411, 2903

3-Oxo-cholesta-1,4-dien-26-oic acid (**412**) (**VI**)

**Figure S20. Mass spectrum  $[M-H]^+$**

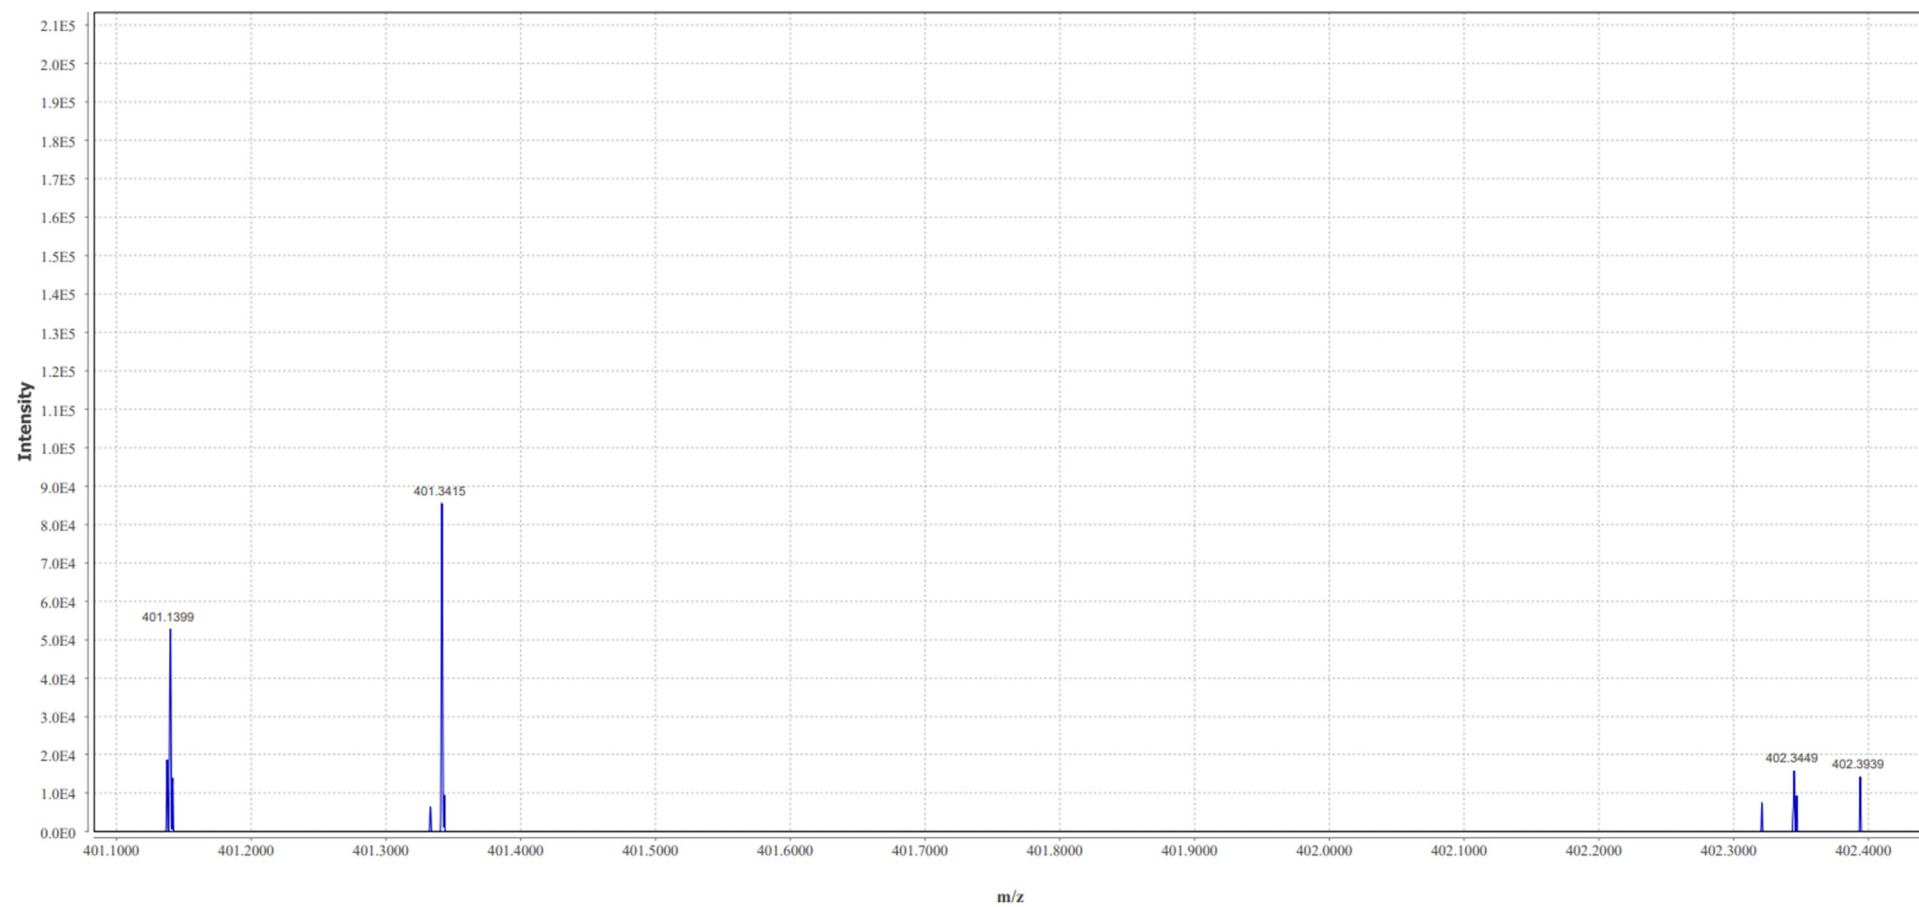

HRMS-ESI (m/z):  $[M-H]^+$  calcd for  $C_{27}H_{45}O_2$  401,3420; found 401,3415

26-Hydroxycholesterol (**402**) (**VII**)

**Figure S21. Mass spectrum  $[M-H]^+$**

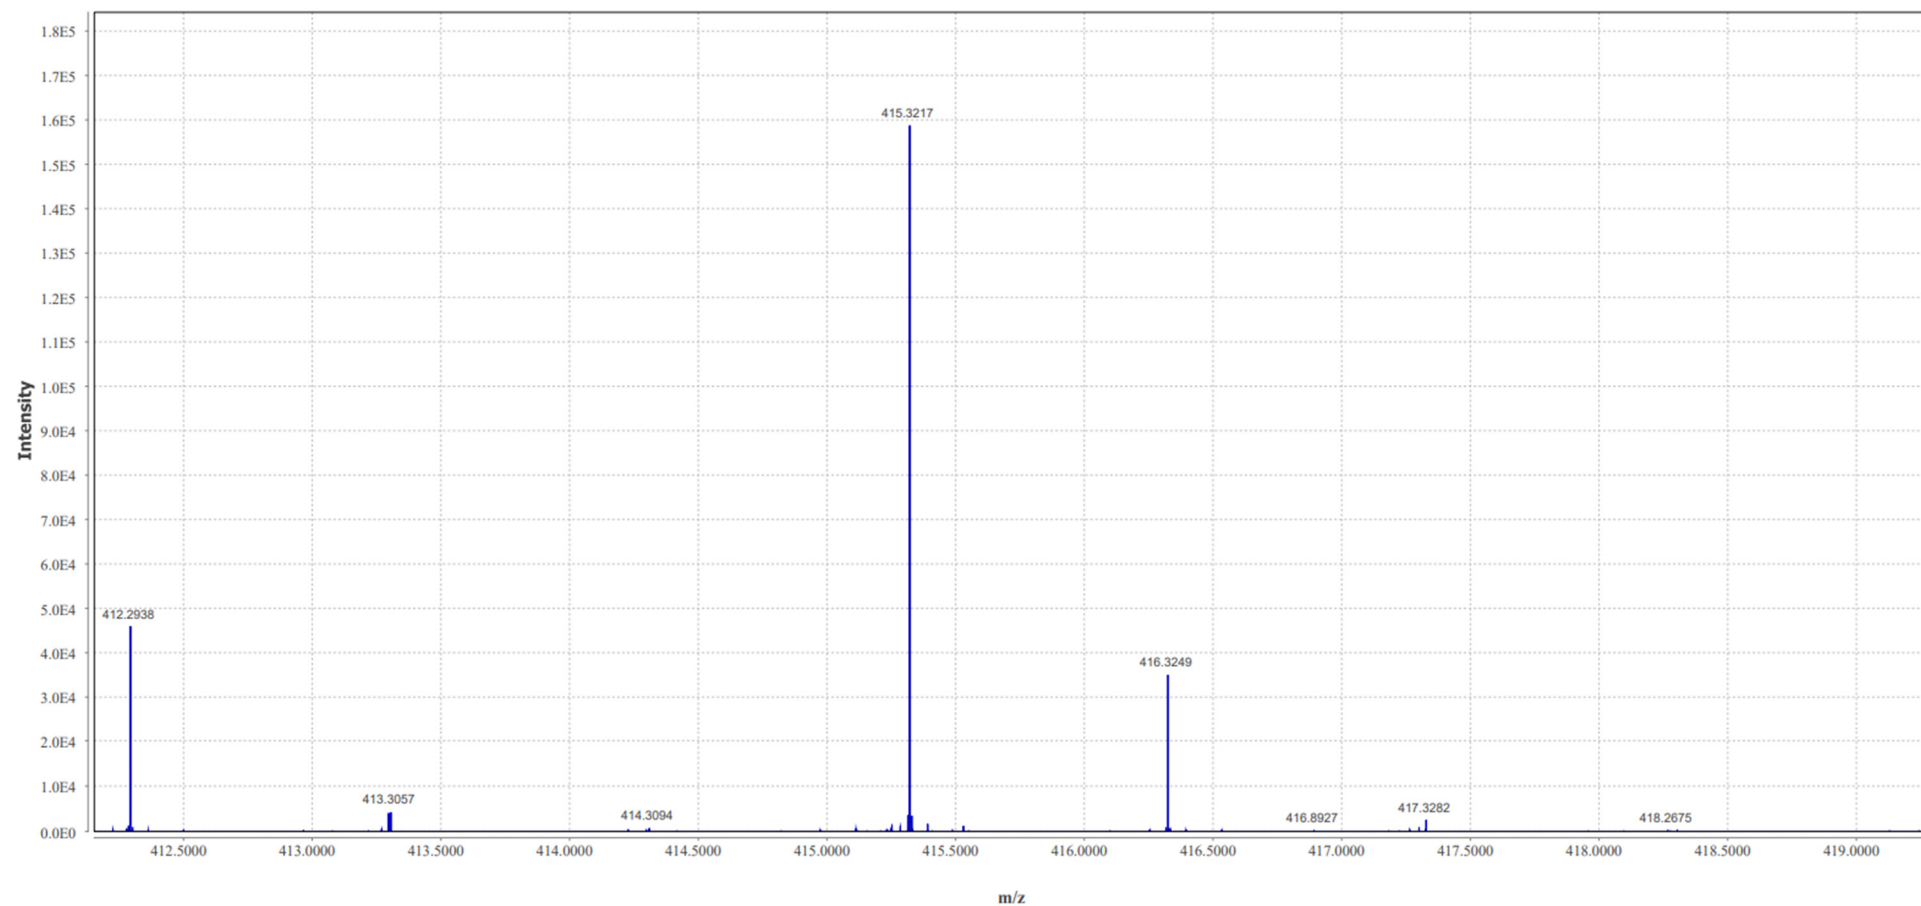

HRMS-ESI ( $m/z$ ):  $[M-H]^+$  calcd for  $C_{27}H_{43}O_3$  415,3212; found 415,3217

3 $\beta$ -Hydroxycholest-5-en-26-oic acid (**416**) (**VIII**)



Figure S22.  $^1\text{H}$ -NMR spectrum

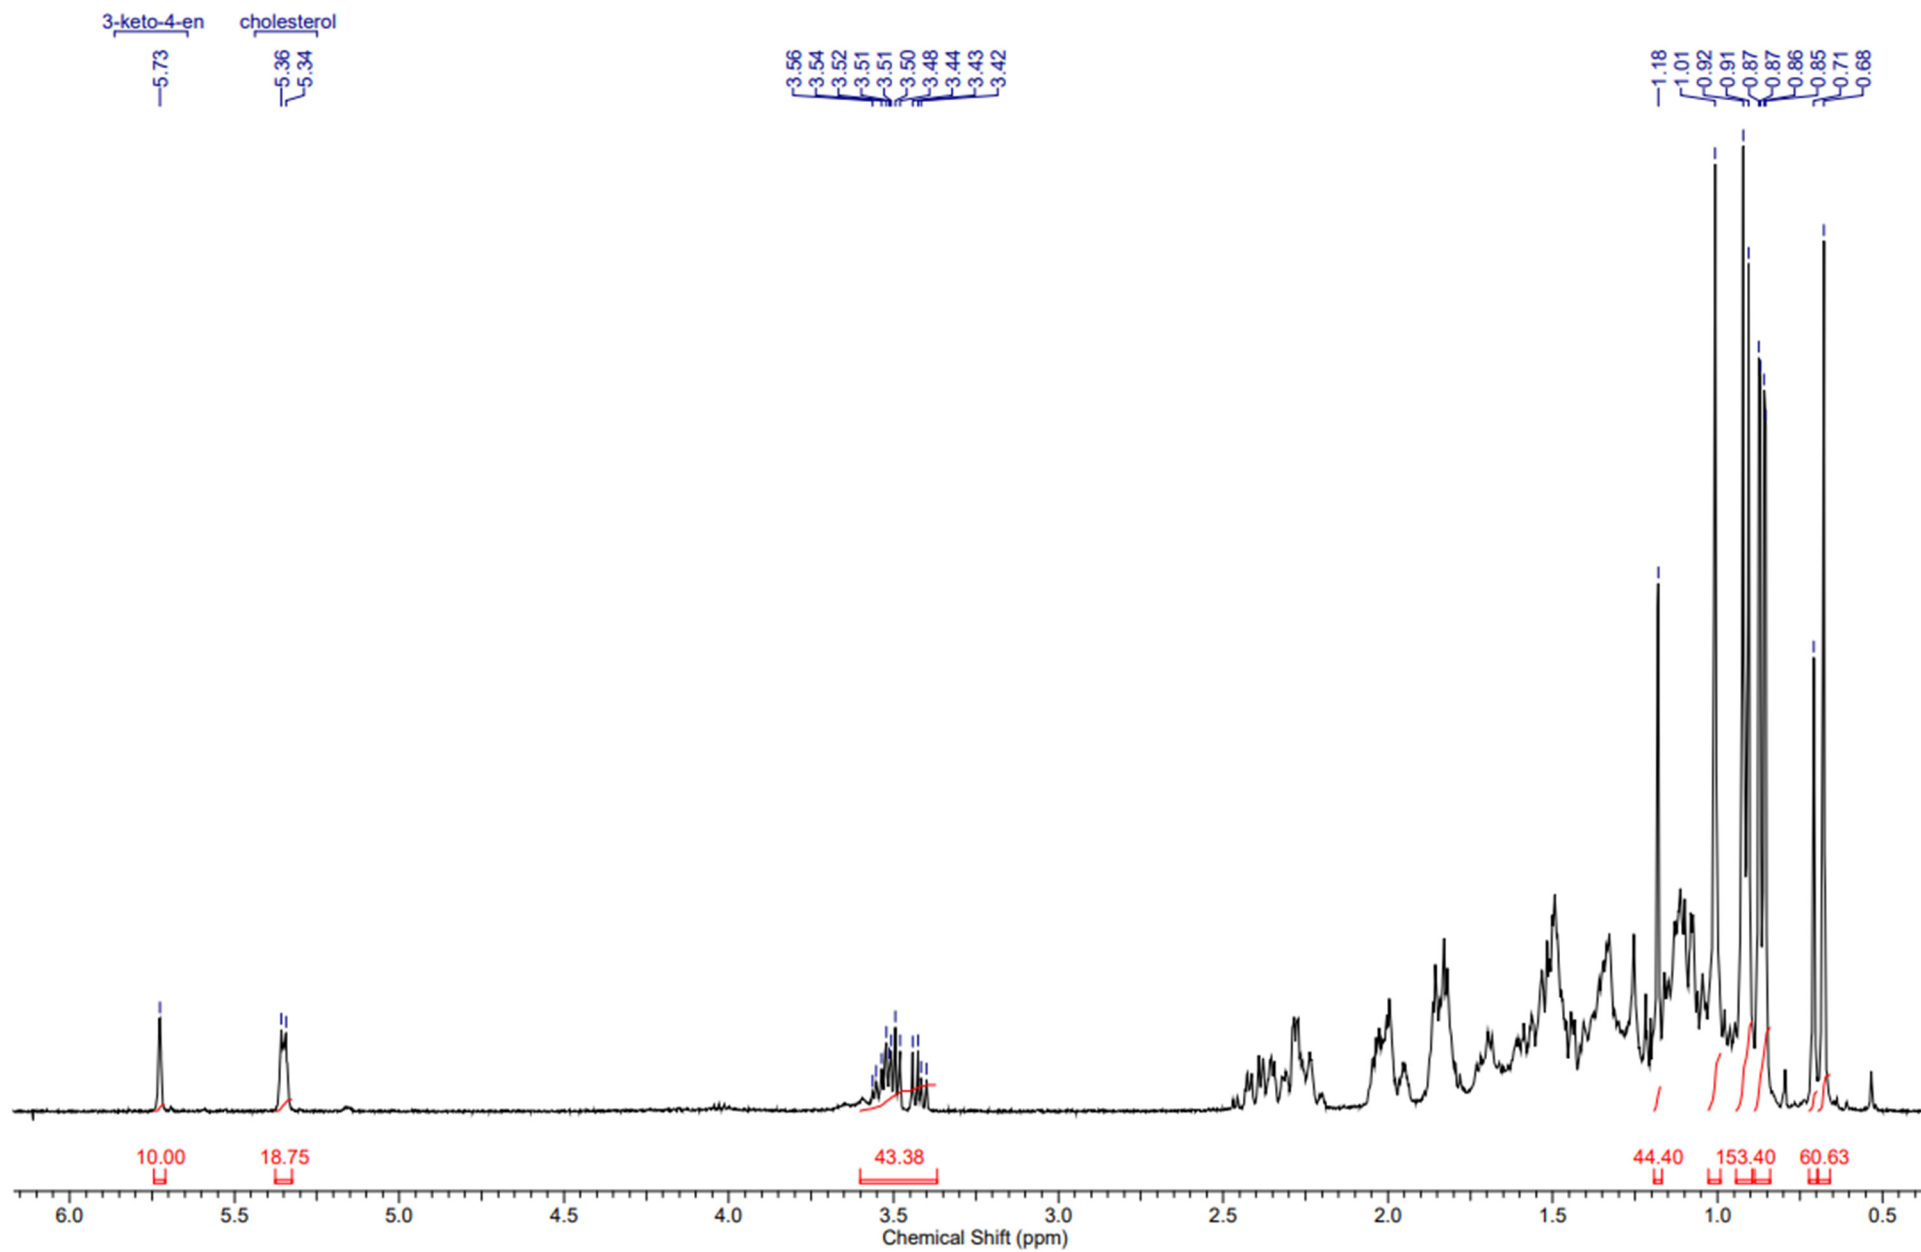

26-Hydroxycholest-4-en-3-one (IV)

Figure S23.  $^1\text{H}$ -NMR spectrum

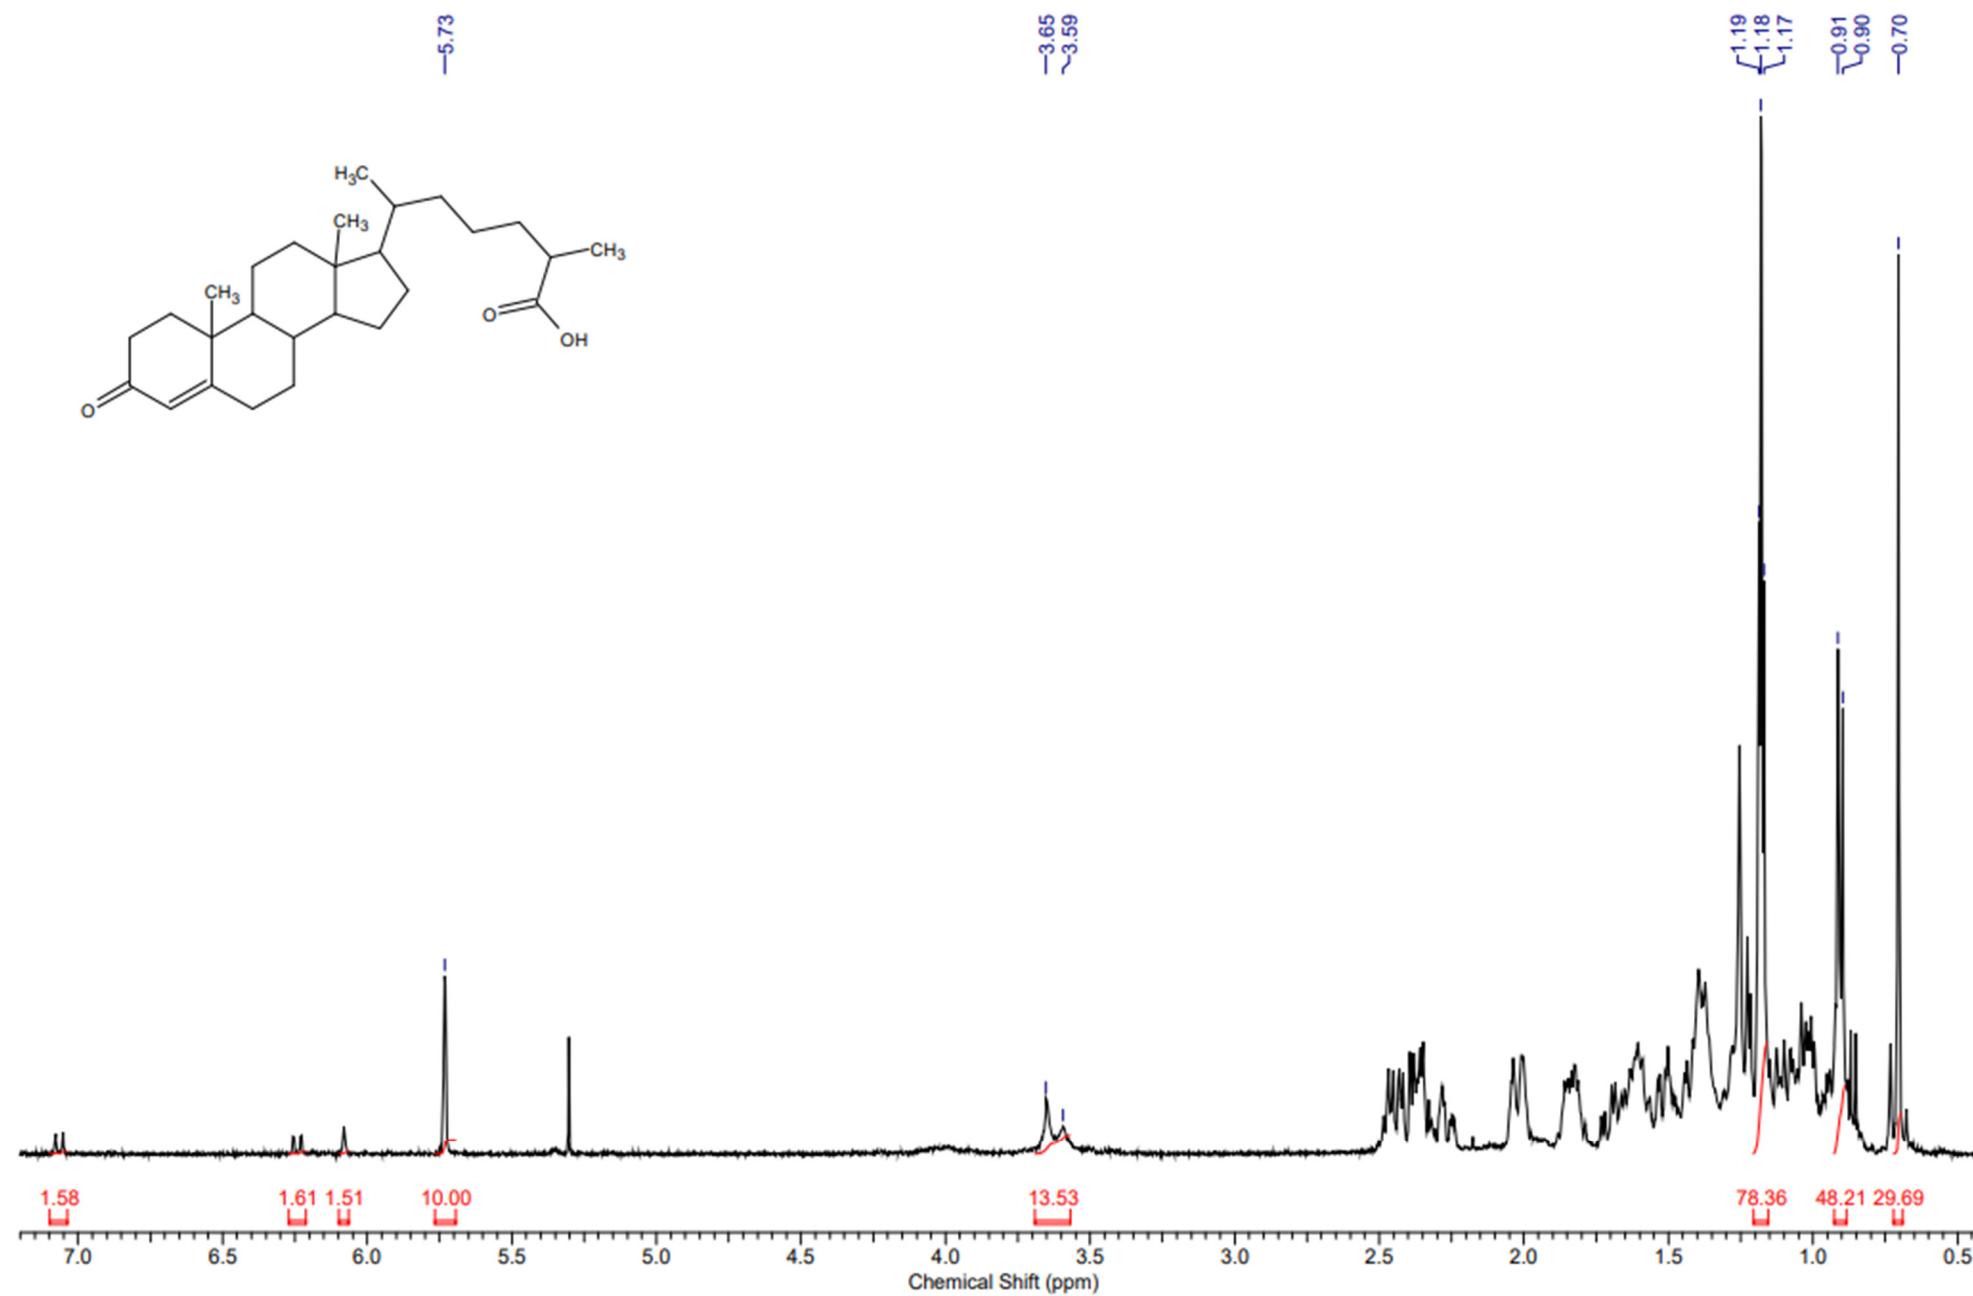

3-Oxo-cholest-4-en-26-oic acid (V)

Figure S24.  $^{13}\text{C}$ -NMR spectrum

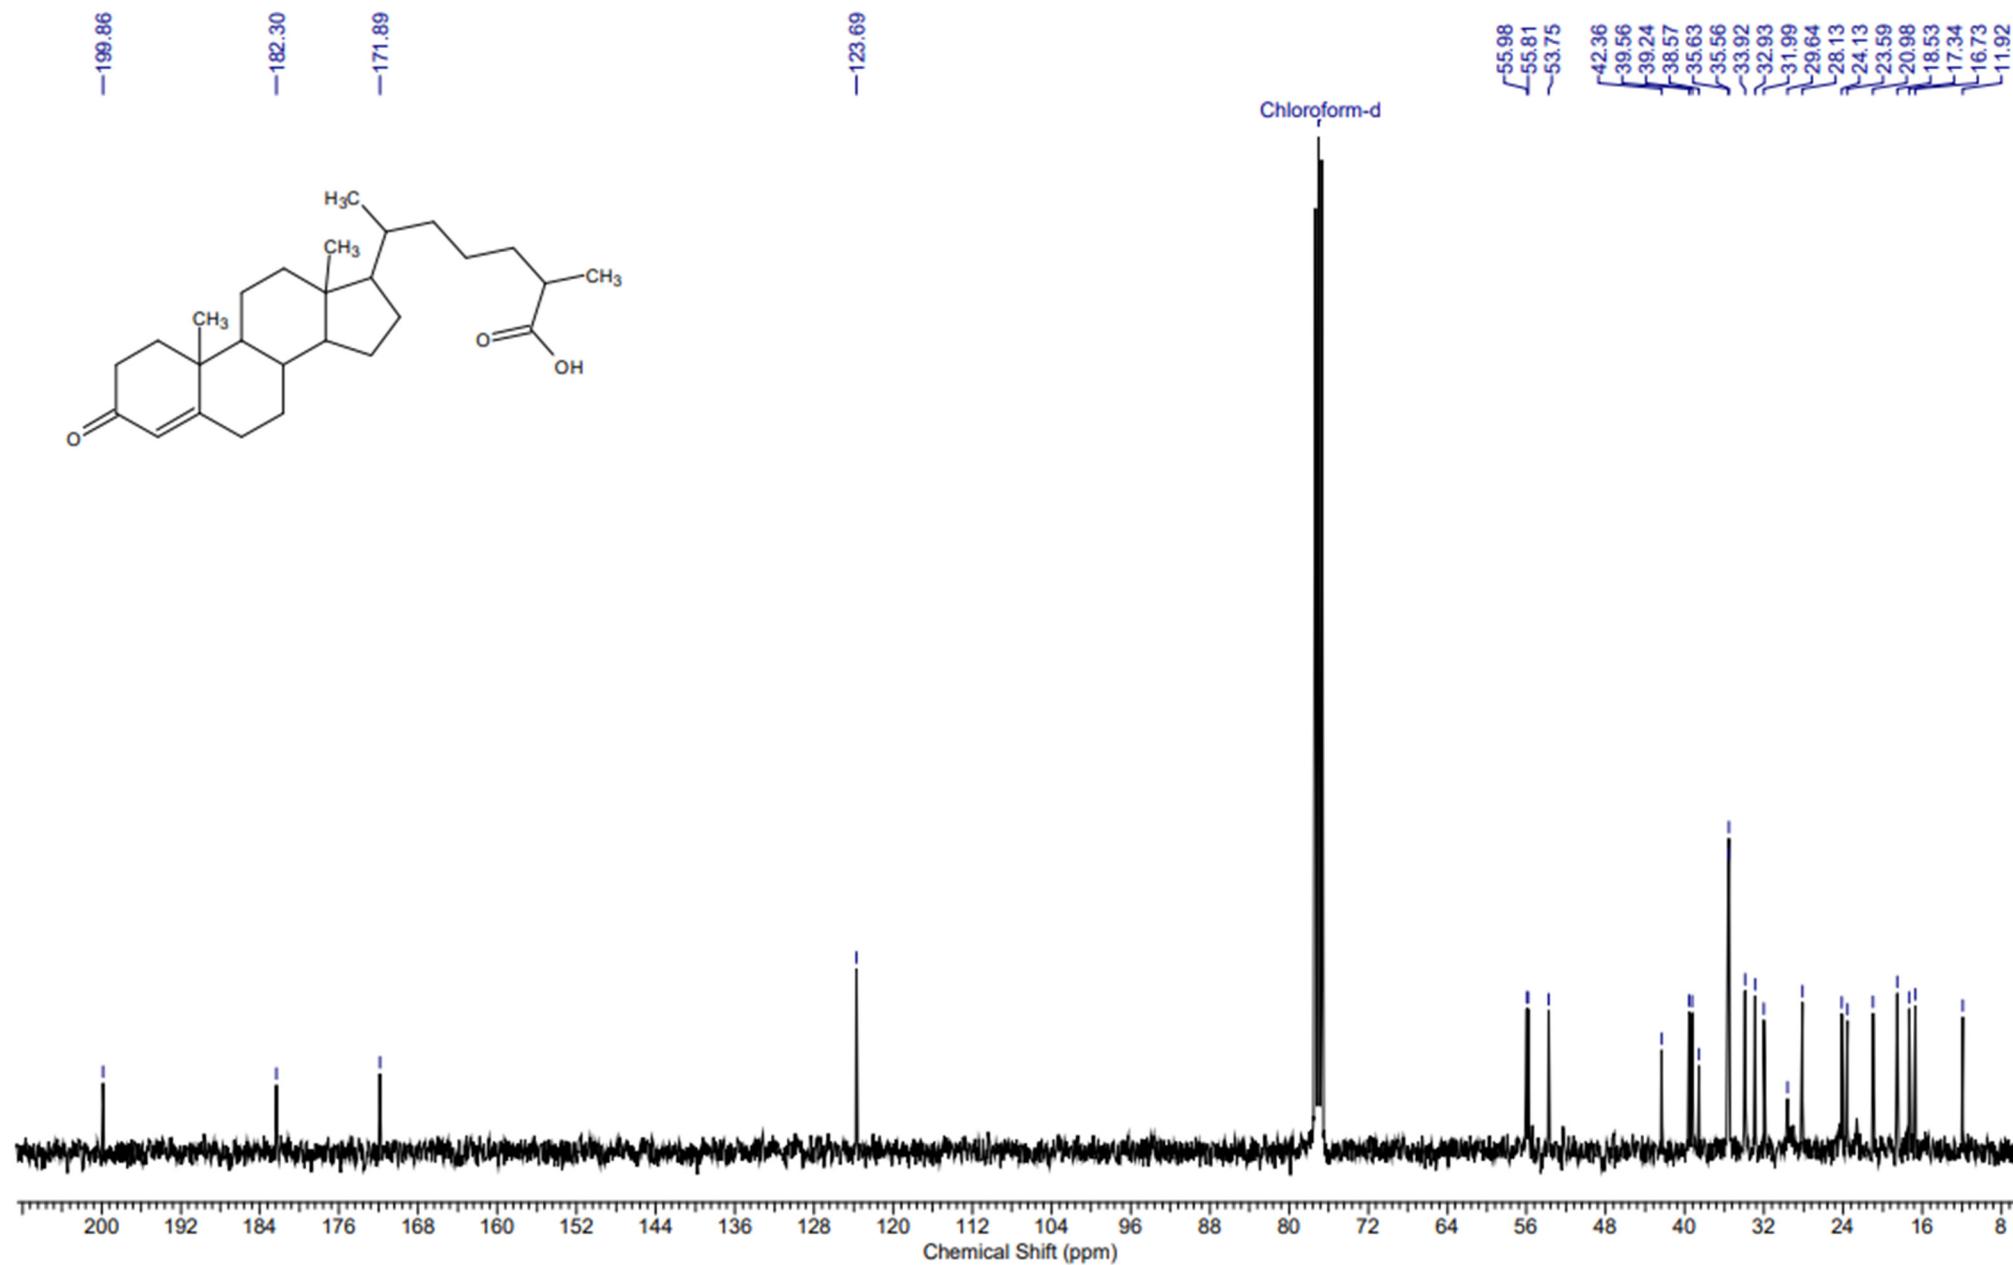

3-Oxo-cholest-4-en-26-oic acid (V)

Figure S25.  $^1\text{H}$ -NMR spectrum

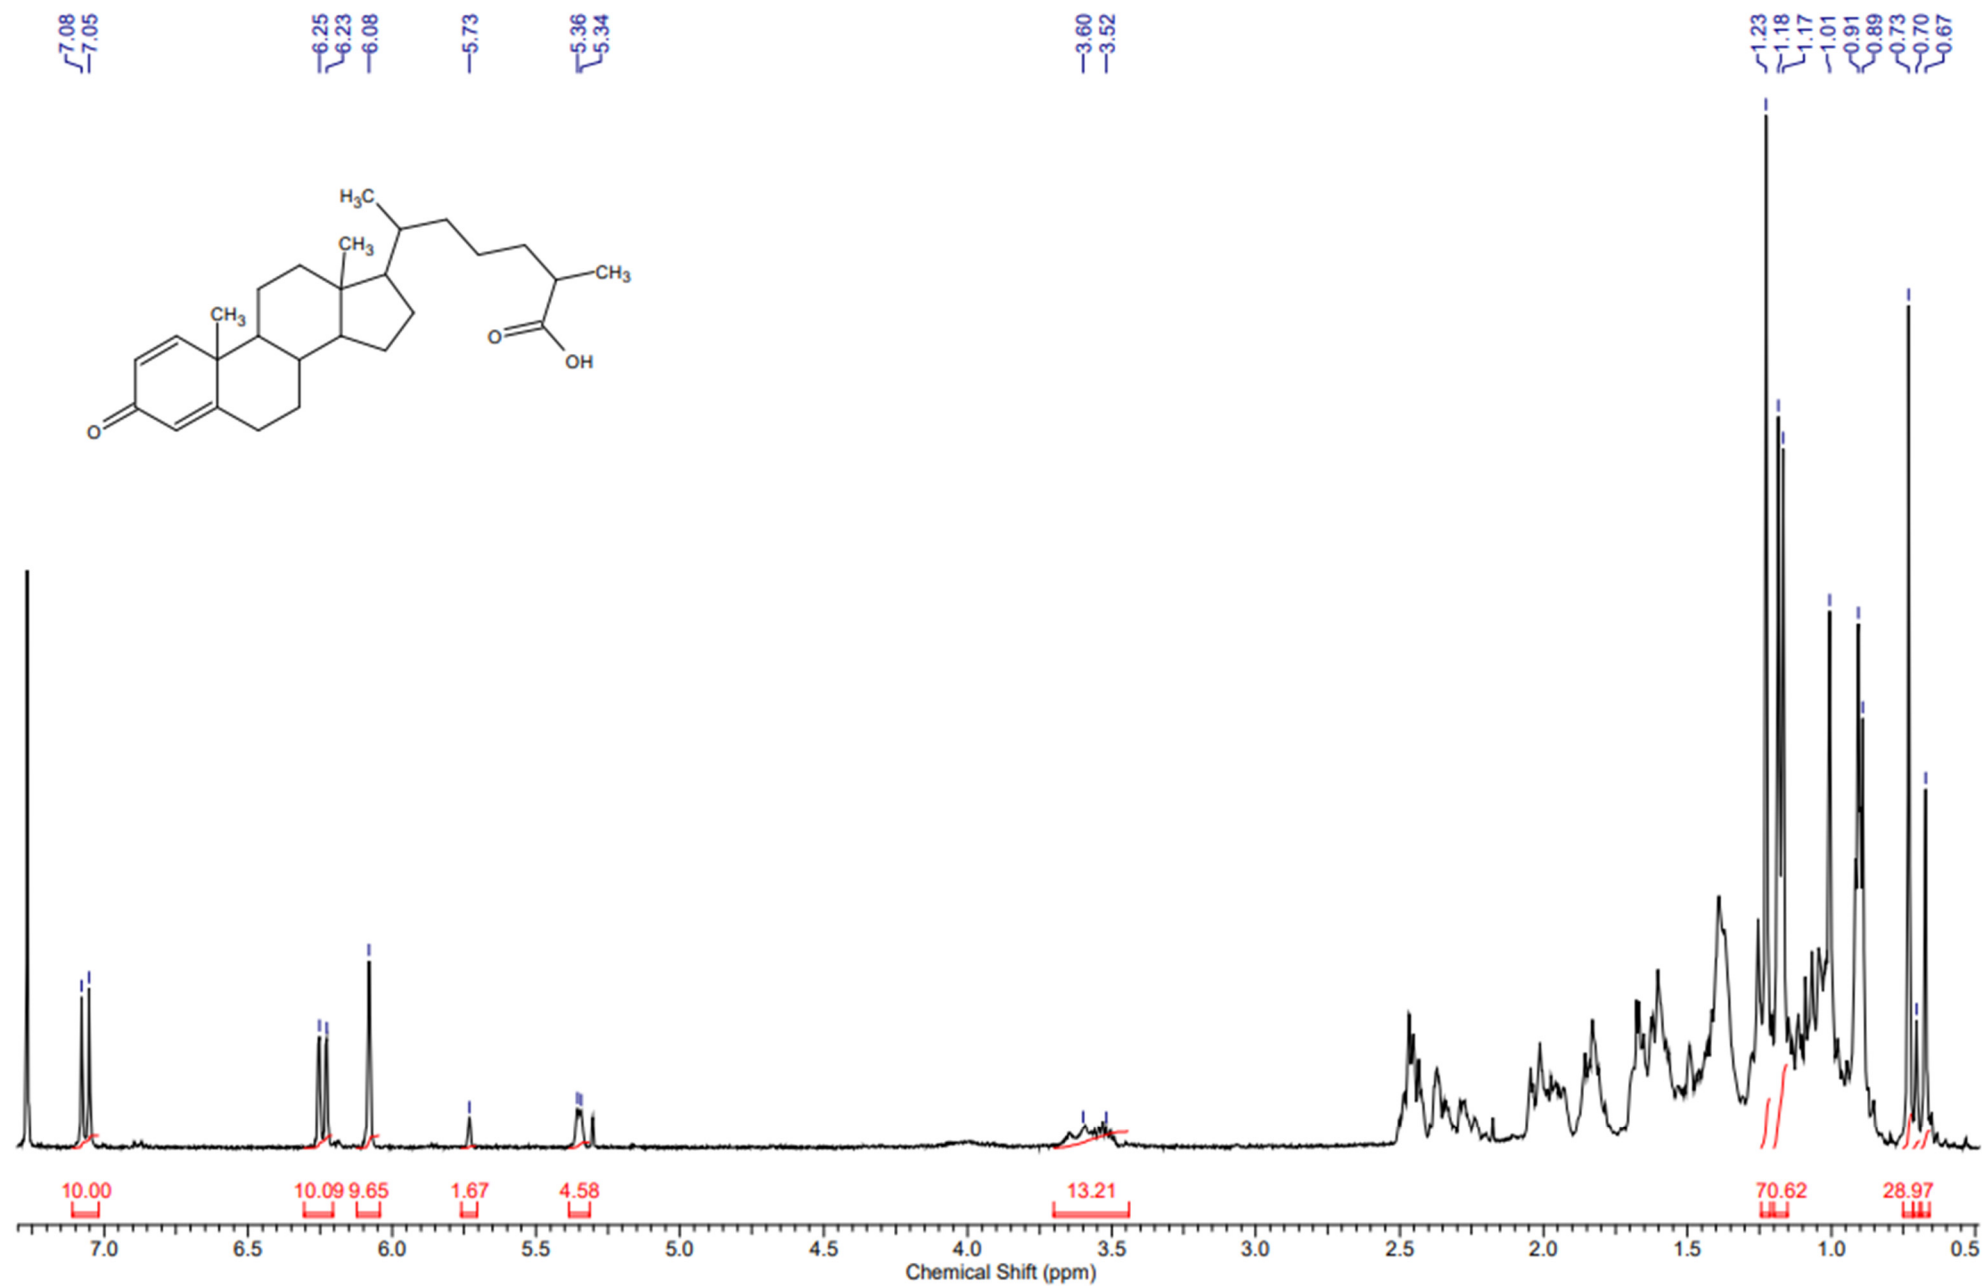

3-Oxo-cholesta-1,4-dien-26-oic acid (VI)

Figure S26.  $^{13}\text{C}$ -NMR spectrum

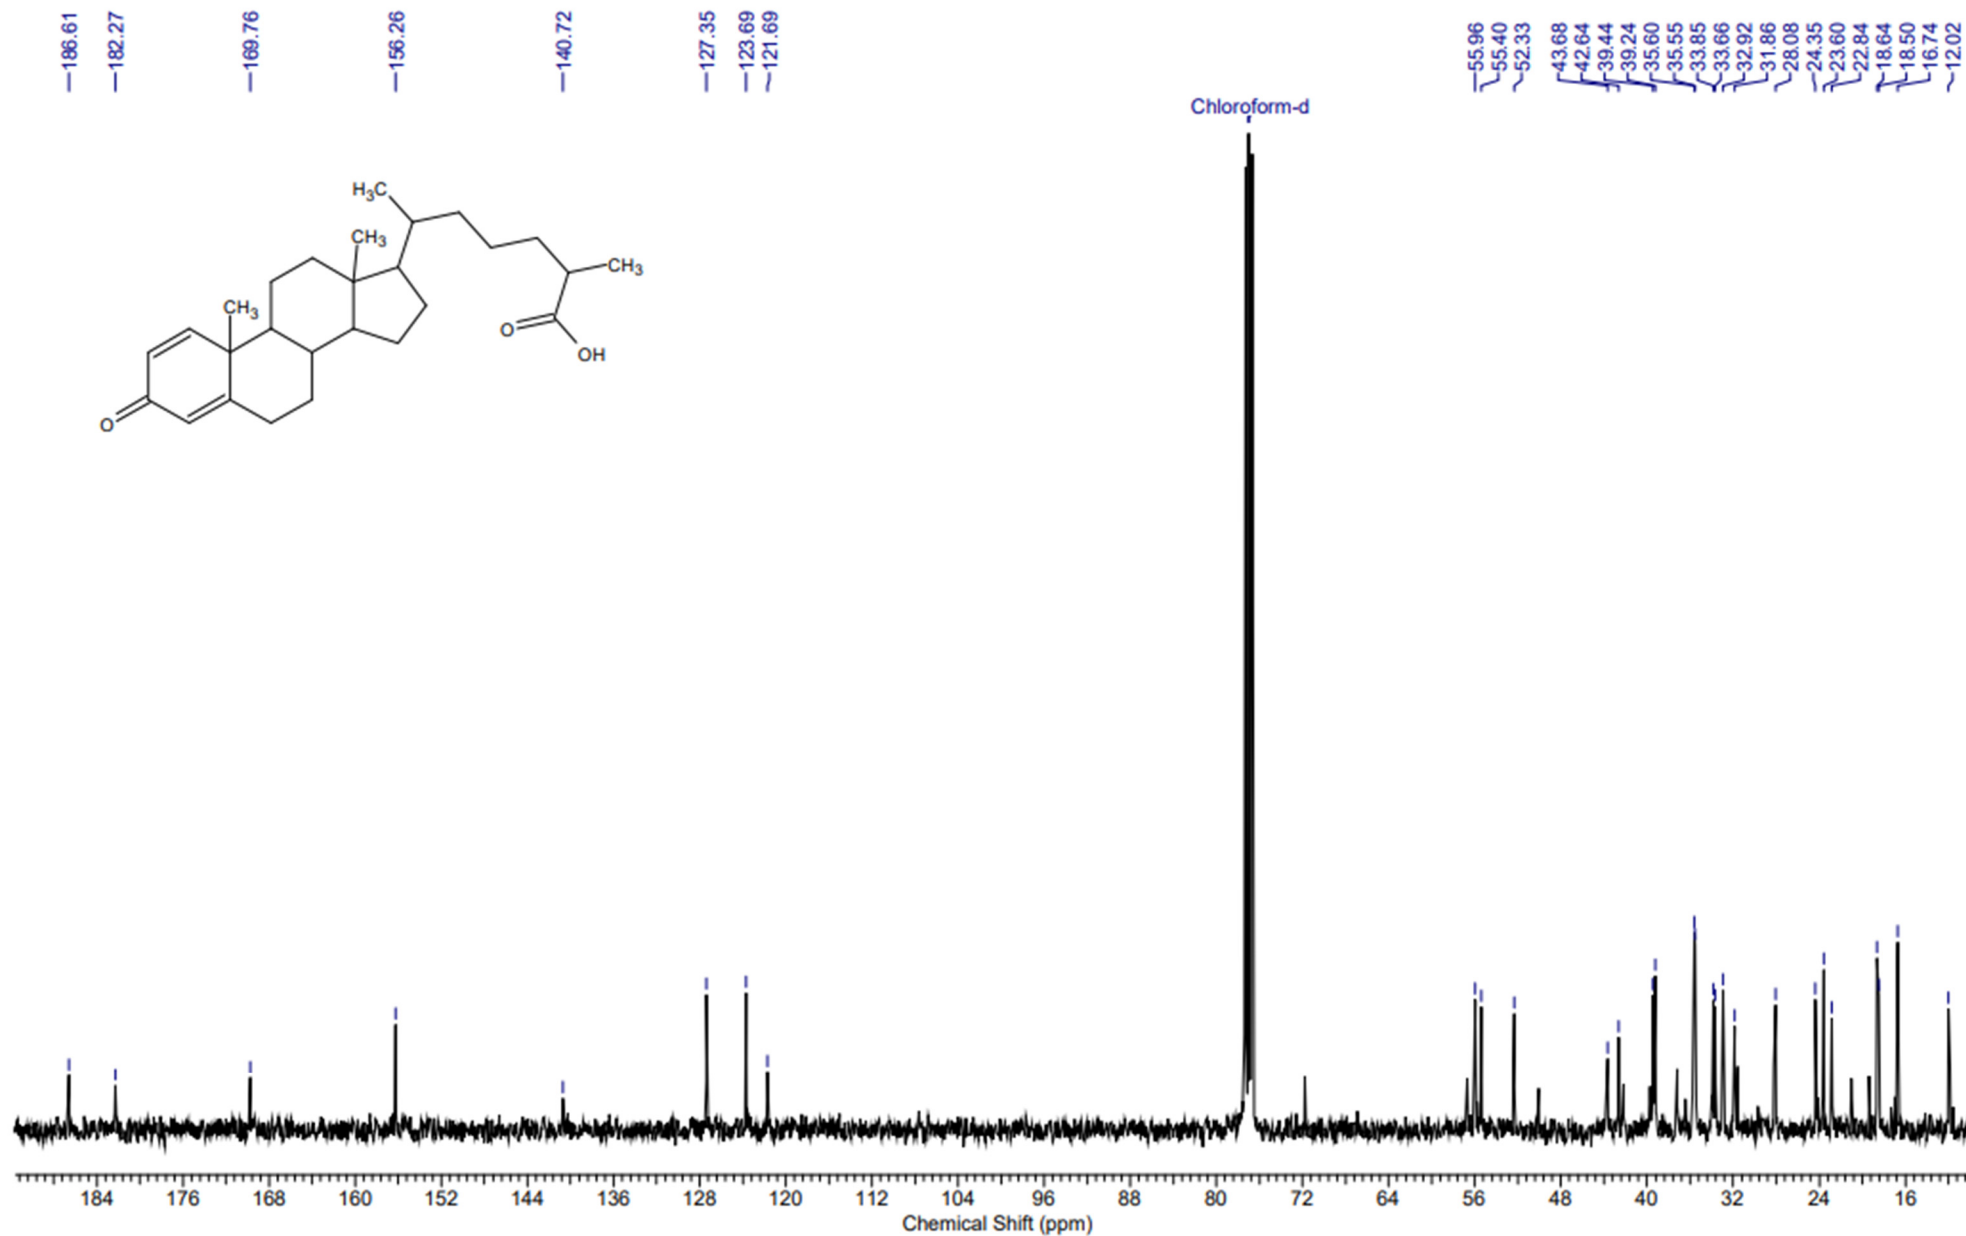

3-Oxo-cholesta-1,4-dien-26-oic acid (VI)

Figure S27.  $^1\text{H}$ -NMR spectrum

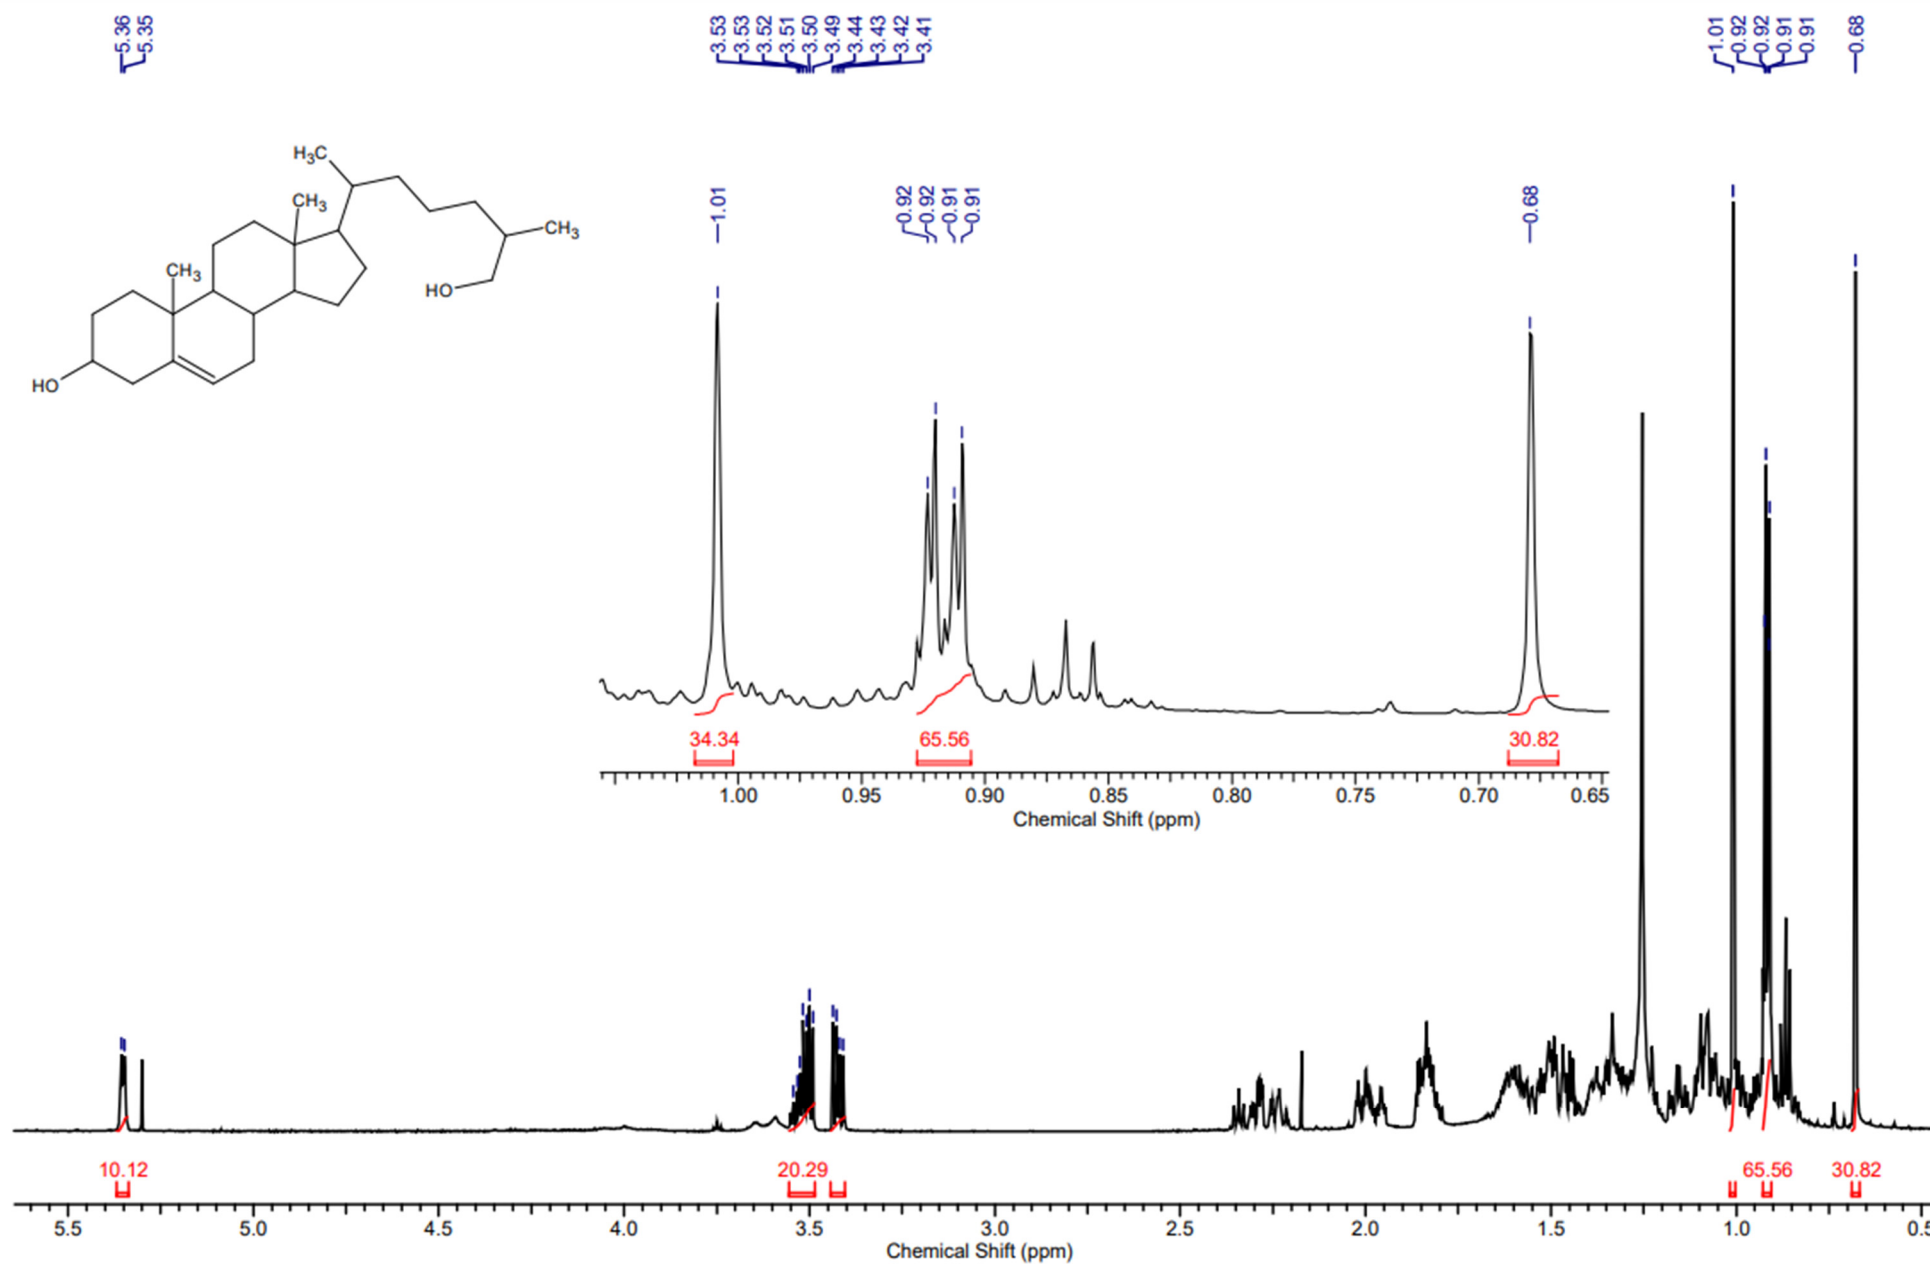

26-Hydroxycholesterol (VII)

Figure S28.  $^{13}\text{C}$ -NMR spectrum

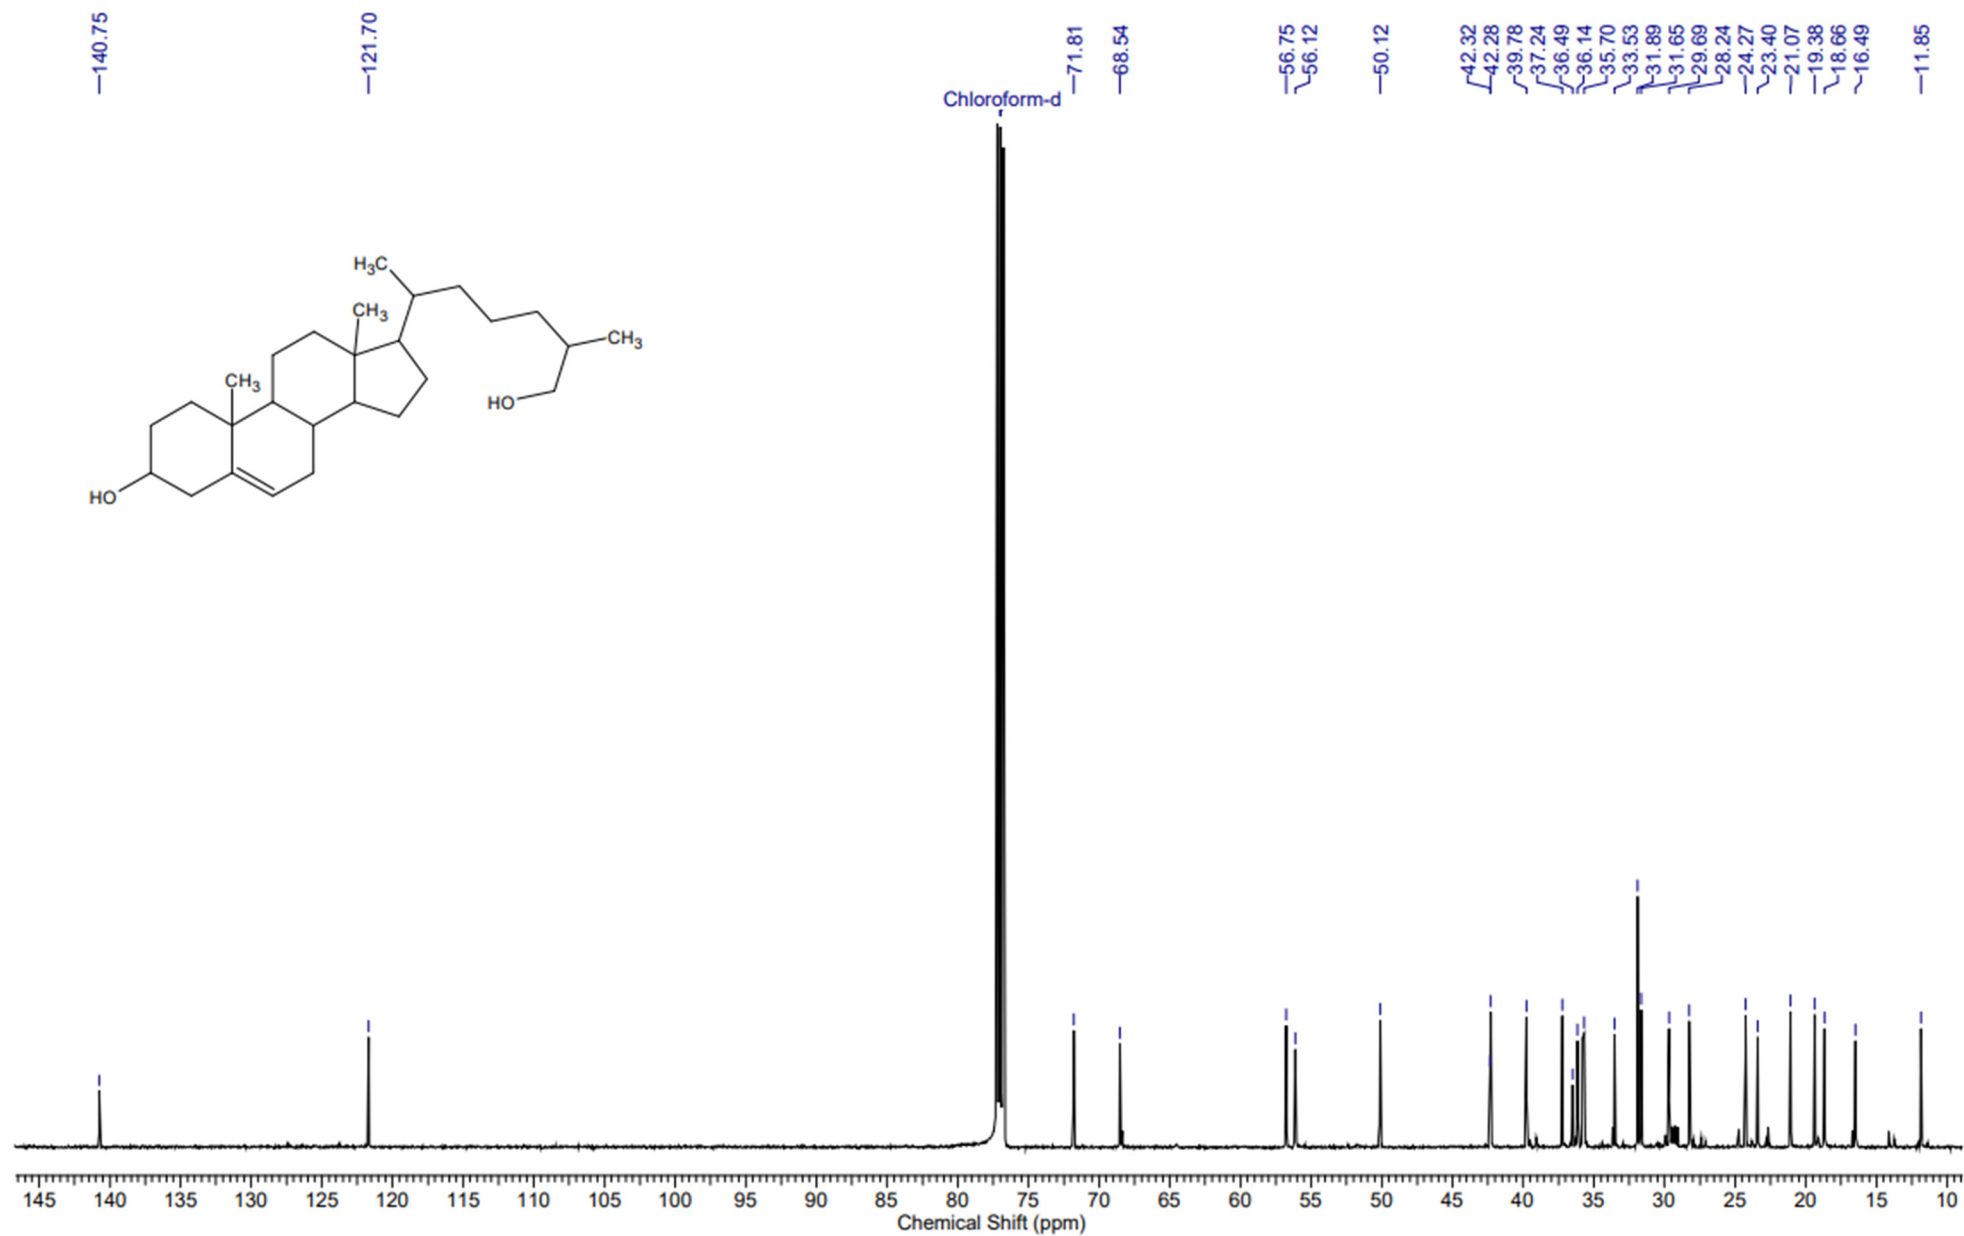

26-Hydroxycholesterol (VII)

Figure S29.  $^1\text{H}$ -NMR spectrum

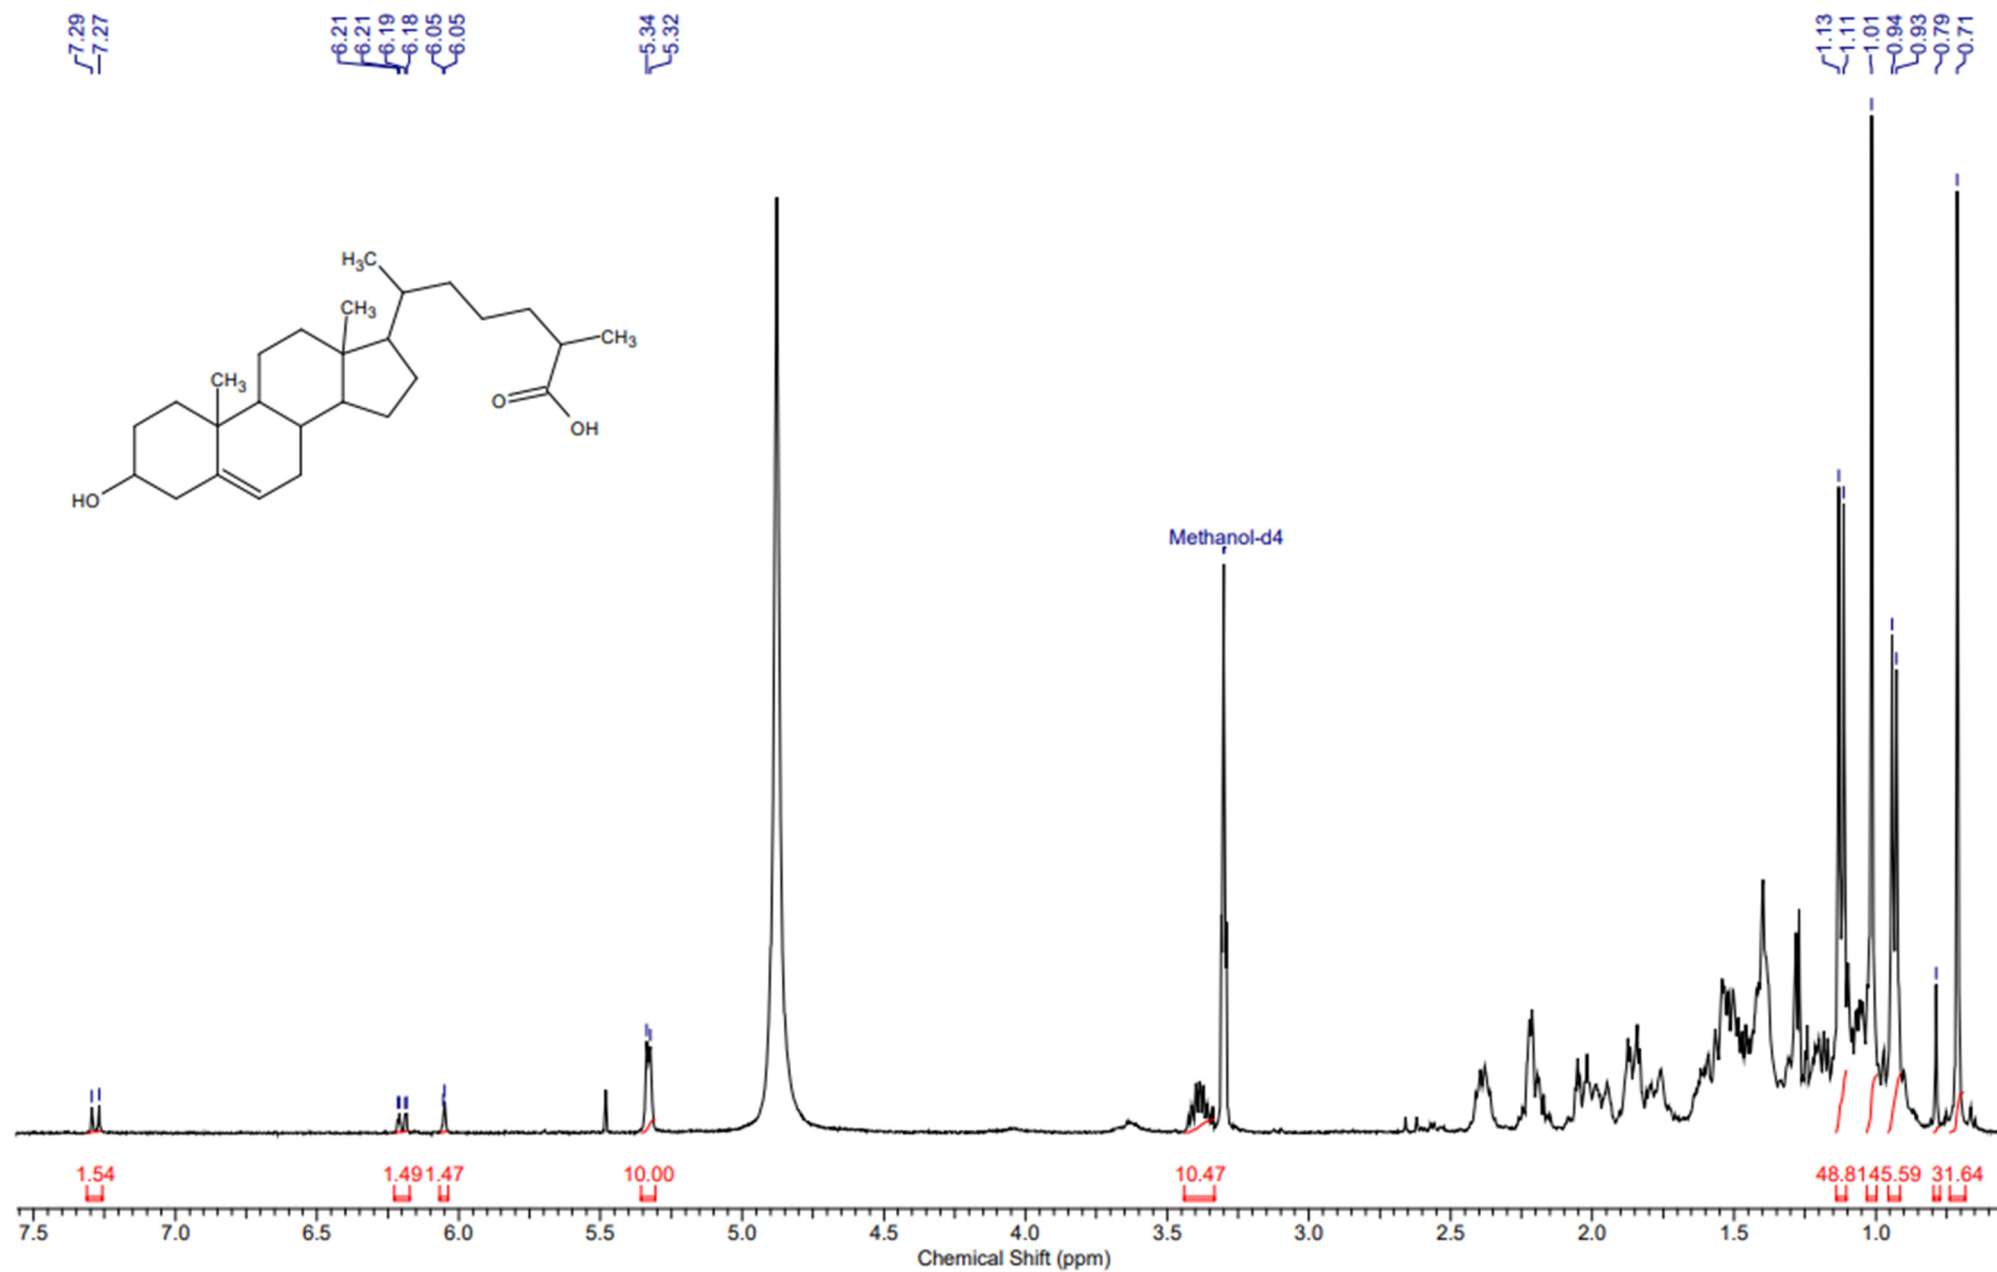

3β-Hydroxycholest-5-en-26-oic acid (VIII)



Figure S30.  $^{13}\text{C}$ -NMR spectrum

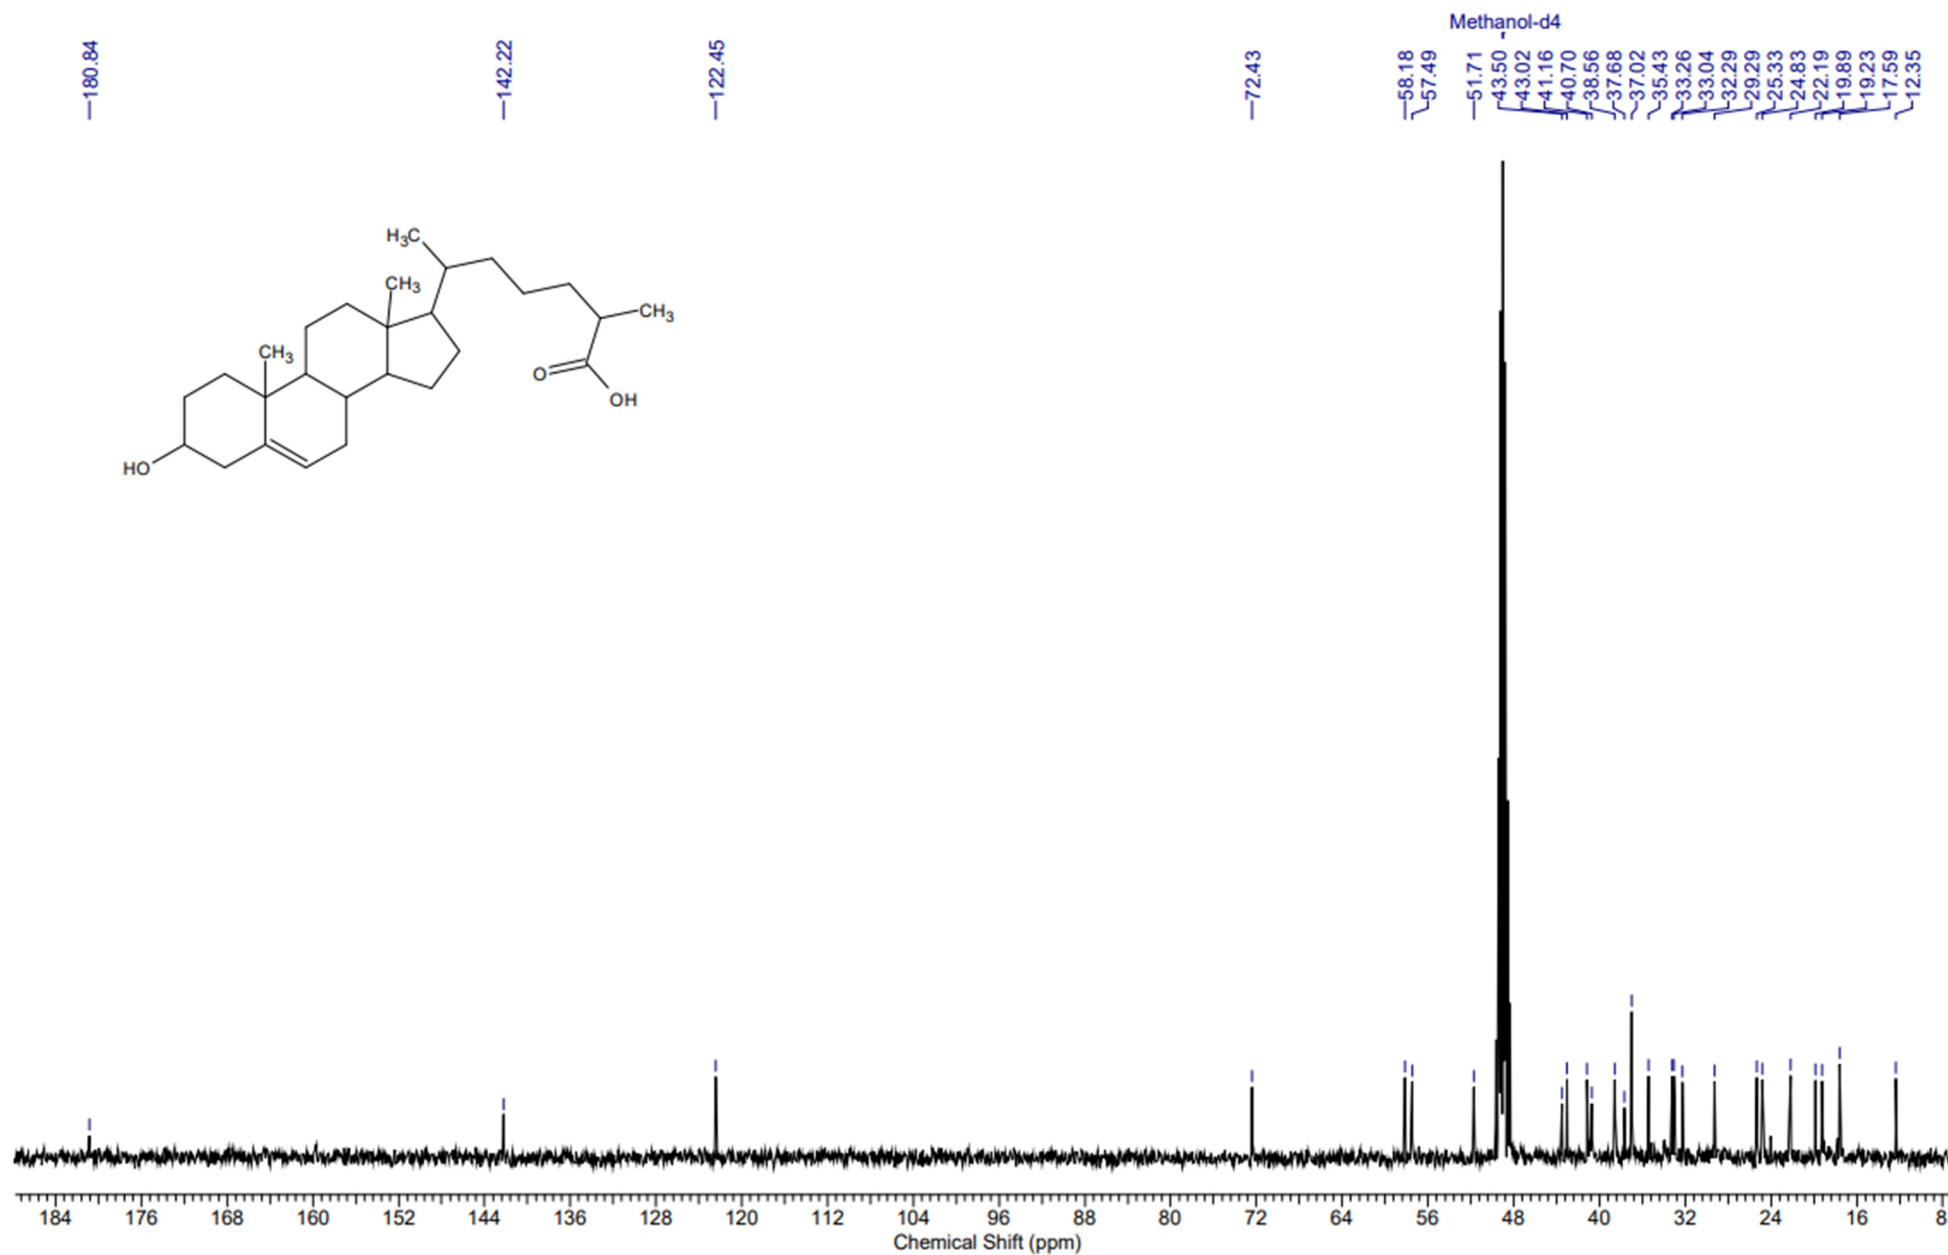

3β-Hydroxycholest-5-en-26-oic acid (VIII)

**Figure S31. Bioconversion of lithocholic acid by *S.hirsuta* VKM Ac-666<sup>T</sup> under the conditions used**

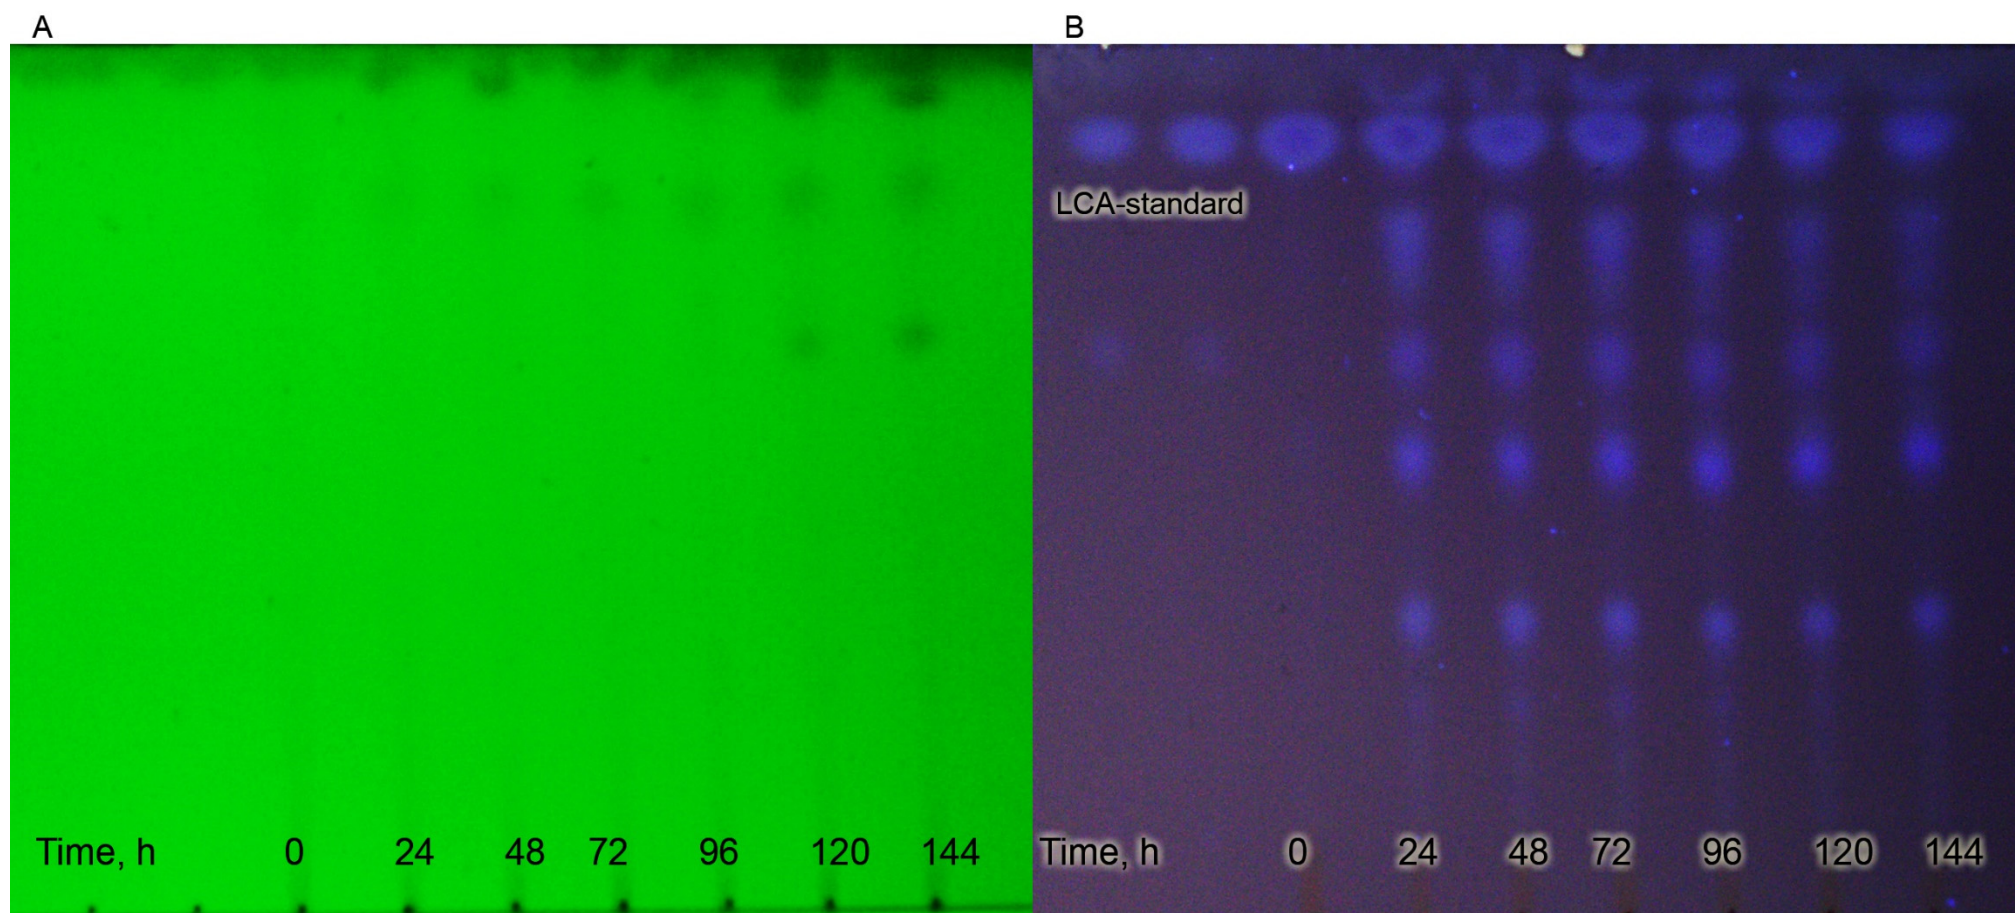

**A.** 3-Keto-4-ene steroids, system CHCl<sub>3</sub>/acetone/CH<sub>3</sub>COOH (50:50:0.5), visualization by UV light (254 nm)

**B.** Compounds with the unchanged A-ring structure, system CHCl<sub>3</sub>/acetone/CH<sub>3</sub>COOH (50:50:0.5); staining of TLC plates using MnCl<sub>2</sub> solution, visualization by UV light (365 nm), reference compound – lithocholic acid (LCA)
