# Supplementary material for: Steroid Metabolism in Thermophilic Actinobacterium Saccharopolyspora hirsuta VKM Ac-666T
Source: MDPI journal article supplement (doi:10.3390/microorganisms9122554), 2021-12-10
Supplement: s1 [file s1]

## Supporting materials

**article title:** Steroid Metabolism in Thermophilic Actinobacteria *Saccharopolyspora hirsuta*

VKM Ac-666<sup>T</sup>

**journal name:** Microorganisms

**author names:** Tatyana Lobastova, Victoria Fokina, Sergey Tarlachkov, Andrey Shutov, Eugeny Bragin, Alexey Kazantsev, Marina Donova

**\*Correspondence:** 2vvfokina@gmail.com

**Supplementary Table S3.** Candidate genes for steroids or bile acids degradation in *S. hirsuta*

VKM Ac-666<sup>T</sup>.

| No.                           | Scaffold acc.  | Locus tag          | Protein acc. | Name/Function          |
|-------------------------------|----------------|--------------------|--------------|------------------------|
| Mce4 transport system         |                |                    |              |                        |
| 1.                            | VWPH01000020.1 | <i>F1721_32550</i> | KAA5825886.1 | <i>mce4F</i>           |
| 2.                            | VWPH01000020.1 | <i>F1721_32555</i> | KAA5825887.1 | <i>mce4E</i>           |
| 3.                            | VWPH01000020.1 | <i>F1721_32560</i> | KAA5825888.1 | <i>mce4D</i>           |
| 4.                            | VWPH01000020.1 | <i>F1721_32565</i> | KAA5825937.1 | <i>mce4C</i>           |
| 5.                            | VWPH01000020.1 | <i>F1721_32570</i> | KAA5825889.1 | <i>mce4B</i>           |
| 6.                            | VWPH01000020.1 | <i>F1721_32575</i> | KAA5825890.1 | <i>mce4A</i>           |
| 7.                            | VWPH01000020.1 | <i>F1721_32580</i> | KAA5825891.1 | <i>yrbEb</i>           |
| 8.                            | VWPH01000020.1 | <i>F1721_32585</i> | KAA5825892.1 | <i>yrbEa</i>           |
| Sterol side chain degradation |                |                    |              |                        |
| 9.                            | VWPH01000020.1 | <i>F1721_32590</i> | KAA5825893.1 | <i>fabG3</i>           |
| 10.                           | VWPH01000020.1 | <i>F1721_32595</i> | KAA5825894.1 | aldehyde dehydrogenase |
| 11.                           | VWPH01000020.1 | <i>F1721_32600</i> | KAA5825895.1 | <i>hsd4A</i>           |
| 12.                           | VWPH01000020.1 | <i>F1721_32605</i> | KAA5825896.1 | <i>fadE26</i>          |

|                    |                |                    |              |                                                |
|--------------------|----------------|--------------------|--------------|------------------------------------------------|
| 13.                | VWPH01000020.1 | <i>F1721_32610</i> | KAA5825897.1 | <i>fadE27</i>                                  |
| 14.                | VWPH01000020.1 | <i>F1721_32615</i> | KAA5825898.1 | <i>fadD17</i>                                  |
| 15.                | VWPH01000020.1 | <i>F1721_32620</i> | KAA5825899.1 | alpha/beta hydrolase                           |
| 16.                | VWPH01000020.1 | <i>F1721_32625</i> | KAA5825900.1 | MerR family<br>transcriptional regulator       |
| 17.                | VWPH01000020.1 | <i>F1721_32630</i> | KAA5825901.1 | nitronate<br>monooxygenase                     |
| 18.                | VWPH01000020.1 | <i>F1721_32635</i> | KAA5825902.1 | <i>fadD19</i>                                  |
| 19.                | VWPH01000020.1 | <i>F1721_32640</i> | KAA5825903.1 | <i>echA19</i>                                  |
| 20.                | VWPH01000020.1 | <i>F1721_32645</i> | KAA5825904.1 | acyl-CoA synthetase                            |
| 21.                | VWPH01000020.1 | <i>F1721_32650</i> | KAA5825905.1 | LLM class F420-<br>dependent<br>oxidoreductase |
| 22.                | VWPH01000020.1 | <i>F1721_32655</i> | KAA5825906.1 | DNA-binding protein                            |
| 23.                | VWPH01000020.1 | <i>F1721_32660</i> | KAA5825907.1 | <i>ltp4</i>                                    |
| 24.                | VWPH01000020.1 | <i>F1721_32665</i> | KAA5825908.1 | <i>ltp3</i>                                    |
| 25.                | VWPH01000020.1 | <i>F1721_32670</i> | KAA5825909.1 | F420-dependent LLM<br>class oxidoreductase     |
| 26.                | VWPH01000020.1 | <i>F1721_32675</i> | KAA5825910.1 | <i>ksdI</i>                                    |
| 27.                | VWPH01000020.1 | <i>F1721_32680</i> | KAA5825911.1 | <i>cyp125</i>                                  |
| 28.                | VWPH01000020.1 | <i>F1721_32685</i> | KAA5825912.1 | <i>fadA5</i>                                   |
| 29.                | VWPH01000020.1 | <i>F1721_32690</i> | KAA5825913.1 | DUF4180 domain-<br>containing protein          |
| Ring A/B oxidation |                |                    |              |                                                |
| 30.                | VWPH01000020.1 | <i>F1721_32695</i> | KAA5825938.1 | helix-turn-helix domain-                       |

|                      |                |                    |              |                                            |
|----------------------|----------------|--------------------|--------------|--------------------------------------------|
|                      |                |                    |              | containing protein                         |
| 31.                  | VWPH01000020.1 | <i>F1721_32700</i> | KAA5825914.1 | <i>hsaB</i>                                |
| 32.                  | VWPH01000020.1 | <i>F1721_32705</i> | KAA5825915.1 | <i>hsaC</i>                                |
| 33.                  | VWPH01000020.1 | <i>F1721_32710</i> | KAA5825916.1 | <i>hsaD</i>                                |
| 34.                  | VWPH01000020.1 | <i>F1721_32715</i> | KAA5825917.1 | <i>hsaA</i>                                |
| 35.                  | VWPH01000020.1 | <i>F1721_32720</i> | KAA5825918.1 | <i>hsaF</i>                                |
| 36.                  | VWPH01000020.1 | <i>F1721_32725</i> | KAA5825919.1 | <i>hsaG</i>                                |
| 37.                  | VWPH01000020.1 | <i>F1721_32730</i> | KAA5825920.1 | <i>hsaE</i>                                |
| 38.                  | VWPH01000020.1 | <i>F1721_32735</i> | KAA5825921.1 | <i>kstD4</i>                               |
| 39.                  | VWPH01000020.1 | <i>F1721_32740</i> | KAA5825922.1 | <i>kstD3</i>                               |
| 40.                  | VWPH01000020.1 | <i>F1721_32745</i> | KAA5825923.1 | <i>kshA</i>                                |
| 41.                  | VWPH01000020.1 | <i>F1721_32750</i> | KAA5825924.1 | hypothetical protein                       |
| 42.                  | VWPH01000020.1 | <i>F1721_32755</i> | KAA5825925.1 | <i>kshB</i>                                |
| “ <i>igr</i> -locus” |                |                    |              |                                            |
| 43.                  | VWPH01000020.1 | <i>F1721_32760</i> | KAA5825939.1 | FAD-binding<br>oxidoreductase              |
| 44.                  | VWPH01000020.1 | <i>F1721_32765</i> | KAA5825926.1 | WYL domain-<br>containing protein          |
| 45.                  | VWPH01000020.1 | <i>F1721_32770</i> | KAA5825927.1 | <i>ltp2</i>                                |
| 46.                  | VWPH01000020.1 | <i>F1721_32775</i> | KAA5825928.1 | <i>chsH1</i>                               |
| 47.                  | VWPH01000020.1 | <i>F1721_32780</i> | KAA5825929.1 | <i>chsH2</i>                               |
| 48.                  | VWPH01000020.1 | <i>F1721_32785</i> | KAA5825930.1 | <i>fadE29</i>                              |
| 49.                  | VWPH01000024.1 | <i>F1721_33645</i> | KAA5825036.1 | <i>fadE28</i>                              |
| 50.                  | VWPH01000024.1 | <i>F1721_33650</i> | KAA5825037.1 | class I SAM-dependent<br>methyltransferase |

|                           |                |                    |              |                                                   |
|---------------------------|----------------|--------------------|--------------|---------------------------------------------------|
| 51.                       | VWPH01000024.1 | <i>F1721_33655</i> | KAA5825022.1 | prenyltransferase                                 |
| 52.                       | VWPH01000024.1 | <i>F1721_33660</i> | KAA5825023.1 | methyltransferase<br>domain-containing<br>protein |
| 53.                       | VWPH01000024.1 | <i>F1721_33665</i> | KAA5825024.1 | glycosyltransferase<br>family 4 protein           |
| Transcriptional regulator |                |                    |              |                                                   |
| 54.                       | VWPH01000024.1 | <i>F1721_33670</i> | KAA5825025.1 | <i>kstR</i>                                       |
| Ring C/D degradation      |                |                    |              |                                                   |
| 55.                       | VWPH01000024.1 | <i>F1721_33675</i> | KAA5825026.1 | MBL fold metallo-<br>hydrolase                    |
| 56.                       | VWPH01000024.1 | <i>F1721_33680</i> | KAA5825027.1 | SDR family<br>oxidoreductase                      |
| 57.                       | VWPH01000024.1 | <i>F1721_33685</i> | KAA5825028.1 | <i>echA20</i>                                     |
| 58.                       | VWPH01000024.1 | <i>F1721_33690</i> | KAA5825029.1 | <i>ipdA</i>                                       |
| 59.                       | VWPH01000024.1 | <i>F1721_33695</i> | KAA5825030.1 | <i>ipdB</i>                                       |
| 60.                       | VWPH01000024.1 | <i>F1721_33700</i> | KAA5825038.1 | <i>ipdC</i>                                       |
| 61.                       | VWPH01000024.1 | <i>F1721_33705</i> | KAA5825039.1 | <i>kstR2</i>                                      |
| 62.                       | VWPH01000024.1 | <i>F1721_33710</i> | KAA5825031.1 | <i>ipdF</i>                                       |
| 63.                       | VWPH01000024.1 | <i>F1721_33715</i> | KAA5825032.1 | <i>fadE30</i>                                     |
| 64.                       | VWPH01000024.1 | <i>F1721_33720</i> | KAA5825033.1 | <i>echA13</i> , enoyl-CoA<br>hydratase            |
| 65.                       | VWPH01000024.1 | <i>F1721_33725</i> | KAA5825040.1 | <i>fadE31</i>                                     |
| 66.                       | VWPH01000024.1 | <i>F1721_33730</i> | KAA5825034.1 | <i>fadE32</i>                                     |
| 67.                       | VWPH01000024.1 | <i>F1721_33735</i> | KAA5825035.1 | <i>fadE33</i>                                     |

| Cholate degradation pathway |                |                    |              |                                                   |
|-----------------------------|----------------|--------------------|--------------|---------------------------------------------------|
| 68.                         | VWPH01000001.1 | <i>F1721_33645</i> | KAA5838019.1 | <i>hsaE3</i>                                      |
| 69.                         | VWPH01000001.1 | <i>F1721_00680</i> | KAA5838020.1 | <i>hsaG3</i>                                      |
| 70.                         | VWPH01000001.1 | <i>F1721_00685</i> | KAA5838021.1 | <i>hsaF3</i>                                      |
| 71.                         | VWPH01000001.1 | <i>F1721_00690</i> | KAA5838022.1 | <i>casA</i>                                       |
| 72.                         | VWPH01000001.1 | <i>F1721_00695</i> | KAA5838023.1 | <i>hsaD3</i>                                      |
| 73.                         | VWPH01000001.1 | <i>F1721_00700</i> | KAA5838439.1 | <i>kstR3</i>                                      |
| 74.                         | VWPH01000001.1 | <i>F1721_00705</i> | KAA5838024.1 | SDR family NAD(P)-<br>dependent<br>oxidoreductase |
| 75.                         | VWPH01000001.1 | <i>F1721_00710</i> | KAA5838025.1 | <i>kstD2</i>                                      |
| 76.                         | VWPH01000001.1 | <i>F1721_00715</i> | KAA5838026.1 | <i>kstD1</i>                                      |
| 77.                         | VWPH01000001.1 | <i>F1721_00720</i> | KAA5838027.1 | SDR family<br>oxidoreductase                      |
| 78.                         | VWPH01000001.1 | <i>F1721_00725</i> | KAA5838028.1 | <i>kshA</i>                                       |
| 79.                         | VWPH01000001.1 | <i>F1721_00730</i> | KAA5838029.1 | hypothetical protein                              |
| 80.                         | VWPH01000001.1 | <i>F1721_00735</i> | KAA5838030.1 | <i>kshB</i>                                       |
| 81.                         | VWPH01000001.1 | <i>F1721_00740</i> | KAA5838031.1 | <i>ksdI</i>                                       |
| 82.                         | VWPH01000001.1 | <i>F1721_00745</i> | KAA5838032.1 | <i>hsaB3</i>                                      |
| 83.                         | VWPH01000001.1 | <i>F1721_00750</i> | KAA5838440.1 | SDR family<br>oxidoreductase                      |
| 84.                         | VWPH01000001.1 | <i>F1721_00755</i> | KAA5838033.1 | <i>hsaA3</i>                                      |
| 85.                         | VWPH01000001.1 | <i>F1721_00760</i> | KAA5838034.1 | <i>hsaC3</i>                                      |
| HIP-CoA synthetase          |                |                    |              |                                                   |
| 86.                         | VWPH01000019.1 | <i>F1721_32060</i> | KAA5826116.1 | <i>fadD3</i>                                      |

| Thiolase                    |                |                    |              |                                            |
|-----------------------------|----------------|--------------------|--------------|--------------------------------------------|
| 87.                         | VWPH01000031.1 | <i>F1721_34155</i> | KAA5824600.1 | <i>fadA6</i>                               |
| Cholesterol oxidases        |                |                    |              |                                            |
| 88.                         | VWPH01000006.1 | <i>F1721_14655</i> | KAA5833518.1 | <i>choD</i>                                |
| 89.                         | VWPH01000004.1 | <i>F1721_09795</i> | KAA5835081.1 | <i>choE</i>                                |
| Transcriptional regulator   |                |                    |              |                                            |
| 90.                         | VWPH01000015.1 | <i>F1721_28735</i> | KAA5828487.1 | <i>kstR3</i>                               |
| Cholate degradation pathway |                |                    |              |                                            |
| 91.                         | VWPH01000015.1 | <i>F1721_28740</i> | KAA5828429.1 | class I SAM-dependent<br>methyltransferase |
| 92.                         | VWPH01000015.1 | <i>F1721_28745</i> | KAA5828430.1 | <i>casA</i>                                |
| 93.                         | VWPH01000015.1 | <i>F1721_28750</i> | KAA5828431.1 | <i>casC/chsE3</i>                          |
| 94.                         | VWPH01000015.1 | <i>F1721_28755</i> | KAA5828432.1 | <i>casE</i>                                |
| 95.                         | VWPH01000015.1 | <i>F1721_28760</i> | KAA5828433.1 | <i>3α-hsd</i>                              |
| 96.                         | VWPH01000015.1 | <i>F1721_28765</i> | KAA5828434.1 | <i>casH</i>                                |
| 97.                         | VWPH01000015.1 | <i>F1721_28770</i> | KAA5828435.1 | <i>casI</i>                                |
| 98.                         | VWPH01000001.1 | <i>F1721_02365</i> | KAA5838304.1 | <i>casE</i>                                |
| 99.                         | VWPH01000001.1 | <i>F1721_02405</i> | KAA5838310.1 | <i>casG</i>                                |
