# Supplementary material for: Steroid Metabolism in Thermophilic Actinobacterium Saccharopolyspora hirsuta VKM Ac-666T
Source: MDPI journal article supplement (doi:10.3390/microorganisms9122554), 2021-12-10
Supplement: s1 [file s1]

## Supporting materials

**article title:** Steroid Metabolism in Thermophilic Actinobacteria *Saccharopolyspora hirsuta*

VKM Ac-666<sup>T</sup>

**journal name:** Microorganisms

**author names:** Tatyana Lobastova, Victoria Fokina, Sergey Tarlachkov, Andrey Shutov, Eugeny Bragin, Alexey Kazantsev, Marina Donova

**\*Correspondence:** 2vvfokina@gmail.com

**Supplementary Table S2.** List of enzymes of steroid catabolism for BLAST+ search.

| No. | Enzyme | Strain                                  | Protein accession number |
|-----|--------|-----------------------------------------|--------------------------|
| 1.  | ChoD   | <i>Mycobacterium tuberculosis</i> H37Rv | CAB01014.1               |
| 2.  | Ltp4   | <i>Mycobacterium tuberculosis</i> UT205 | CCE38944.1               |
| 3.  | Ltp3   | <i>Mycobacterium tuberculosis</i> UT205 | CCE38945.1               |
| 4.  | Hsd4A  | <i>Mycobacterium tuberculosis</i> H37Rv | NP_218019.1              |
| 5.  | FadE26 | <i>Mycobacterium tuberculosis</i> H37Rv | NP_218021.1              |
| 6.  | FadE27 | <i>Mycobacterium tuberculosis</i> H37Rv | NP_218022.1              |
| 7.  | FadD17 | <i>Mycobacterium tuberculosis</i> H37Rv | NP_218023.1              |
| 8.  | EchA19 | <i>Mycobacterium tuberculosis</i> H37Rv | NP_218033.1              |
| 9.  | KshA   | <i>Mycobacterium tuberculosis</i> H37Rv | NP_218043.1              |
| 10. | HsaF   | <i>Mycobacterium tuberculosis</i> H37Rv | NP_218051.1              |
| 11. | HsaE   | <i>Mycobacterium tuberculosis</i> H37Rv | NP_218053.1              |
| 12. | KstD   | <i>Mycobacterium tuberculosis</i> H37Rv | NP_218054.1              |
| 13. | FadE29 | <i>Mycobacterium tuberculosis</i> H37Rv | NP_218060.1              |
| 14. | FadE28 | <i>Mycobacterium tuberculosis</i> H37Rv | NP_218061.1              |

|     |        |                                         |                |
|-----|--------|-----------------------------------------|----------------|
| 15. | Cyp125 | <i>Mycobacterium tuberculosis</i> H37Rv | NP_218062.1    |
| 16. | FadA5  | <i>Mycobacterium tuberculosis</i> H37Rv | NP_218063.1    |
| 17. | EchA20 | <i>Mycobacterium tuberculosis</i> H37Rv | NP_218067.1    |
| 18. | FadE30 | <i>Mycobacterium tuberculosis</i> H37Rv | NP_218077.1    |
| 19. | FadD3  | <i>Mycobacterium tuberculosis</i> H37Rv | NP_218078.1    |
| 20. | HsaB   | <i>Mycobacterium tuberculosis</i> H37Rv | NP_218084.1    |
| 21. | HsaC   | <i>Mycobacterium tuberculosis</i> H37Rv | NP_218085.1    |
| 22. | HsaD   | <i>Mycobacterium tuberculosis</i> H37Rv | NP_218086.1    |
| 23. | HsaA   | <i>Mycobacterium tuberculosis</i> H37Rv | NP_218087.1    |
| 24. | KshB   | <i>Mycobacterium tuberculosis</i> H37Rv | NP_218088.1    |
| 25. | IpdB   | <i>Mycobacterium tuberculosis</i> H37Rv | P9WPV9.1       |
| 26. | ChsH1  | <i>Mycobacterium tuberculosis</i>       | WP_003419290.1 |
| 27. | ChsH2  | <i>Mycobacterium canettii</i>           | WP_014001796.1 |
| 28. | FadD19 | <i>Mycobacterium tuberculosis</i> H37Rv | YP_177983.1    |
| 29. | Hsd4B  | <i>Mycobacterium tuberculosis</i> H37Rv | YP_177986.1    |
