# Supplementary material for: Steroid Metabolism in Thermophilic Actinobacterium Saccharopolyspora hirsuta VKM Ac-666T
Source: MDPI journal article supplement (doi:10.3390/microorganisms9122554), 2021-12-10
Supplement: s1 [file s1]

## Supporting materials

**article title:** Steroid Metabolism in Thermophilic Actinobacteria *Saccharopolyspora hirsuta* VKM Ac-666<sup>T</sup>

**journal name:** Microorganisms

**author names:** Tatyana Lobastova, Victoria Fokina, Sergey Tarlachkov, Andrey Shutov, Eugeny Bragin, Alexey Kazantsev, Marina Donova

**\*Correspondence:** 2vvfokina@gmail.com

**Supplementary Table S5.** Actinobacterial strains with the similar proteins to the reference KshA, KshB, KstD of *M. tuberculosis* H37Rv.

| No.                                                                                      | Strain                                   | Protein_ID | Protein length | Query cover (%) | e-value               | Number of identical amino acids | % of identical amino acids |
|------------------------------------------------------------------------------------------|------------------------------------------|------------|----------------|-----------------|-----------------------|---------------------------------|----------------------------|
| <b>KshA,</b><br>NP_218043.1 <i>M. tuberculosis</i> H37Rv; protein length = <b>386 aa</b> |                                          |            |                |                 |                       |                                 |                            |
| <b>1</b>                                                                                 | <i>Thermomonospora curvata</i> DSM 43183 | ACY99045.1 | <b>386</b>     | <b>97</b>       | 2.00E-146<br>(2e-165) | 212                             | <b>54.9</b>                |
| <b>2</b>                                                                                 | <i>Amycolatopsis granulosa</i> DSM 45669 | NIH88125.1 | <b>378</b>     | <b>95</b>       | 1.00E-162<br>(0.0)    | 237                             | <b>62.7</b>                |

[illegible]

|          |                                                        |                |            |           |                       |     |             |
|----------|--------------------------------------------------------|----------------|------------|-----------|-----------------------|-----|-------------|
| <b>1</b> | <i>Thermomonospora curvata</i> DSM 43183               | ACY99056.1     | <b>351</b> | <b>92</b> | 9.00E-106<br>(1e-134) | 194 | <b>55.2</b> |
| <b>2</b> | <i>Amycolatopsis granulosa</i> DSM 45669               | NIH88123.1     | <b>337</b> | <b>95</b> | 1.00E-94<br>(8e-119)  | 183 | <b>54.3</b> |
|          |                                                        | NIH83853.1     | <b>363</b> | <b>94</b> | 4.00E-88<br>(1e-113)  | 171 | <b>47.1</b> |
| <b>3</b> | <i>Thermocatellispora tengchongensis</i> DSM 45615     | MBB5136877.1   | <b>344</b> | <b>92</b> | 2.00E-102<br>(1e-127) | 195 | <b>56.7</b> |
| <b>4</b> | <i>Amycolatopsis methanolica</i> 239                   | WP_017983770.1 | <b>337</b> | <b>95</b> | 4.00E-95<br>(2e-125)  | 180 | <b>53.4</b> |
| <b>5</b> | <i>Amycolatopsis thermalba</i> strain 50.9b<br>NODE_16 | WP_094008251.1 | <b>337</b> | <b>95</b> | 4.00E-97<br>(5e-128)  | 184 | <b>54.6</b> |
| <b>6</b> | <i>Amycolatopsis ruanii</i><br>strain 49.3e NODE_6     | WP_116109913.1 | <b>337</b> | <b>95</b> | 3.00E-96<br>(4e-127)  | 183 | <b>54.3</b> |

|                                                                                                                                                             |                                                           |                |            |           |                       |     |             |
|-------------------------------------------------------------------------------------------------------------------------------------------------------------|-----------------------------------------------------------|----------------|------------|-----------|-----------------------|-----|-------------|
| <b>7</b>                                                                                                                                                    | <i>Microbispora<br/>siamensis</i> NBRC<br>104113          | GIH66241.1     | <b>357</b> | <b>95</b> | 5.00E-102<br>(7e-134) | 197 | <b>55.2</b> |
| <p style="text-align: center;"><b>KstD,</b></p> <p style="text-align: center;">NP_218054.1 <i>M. tuberculosis</i> H37Rv; protein length = <b>563 aa</b></p> |                                                           |                |            |           |                       |     |             |
| <b>1</b>                                                                                                                                                    | <i>Thermomonospora<br/>curvata</i> DSM 43183              | ACY99057.1     | <b>559</b> | <b>97</b> | 6.00E-131<br>(5e-152) | 266 | <b>47.6</b> |
| <b>2</b>                                                                                                                                                    | <i>Amycolatopsis<br/>granulosa</i> DSM 45669              | NIH88126.1     | <b>555</b> | <b>98</b> | 0.0                   | 344 | <b>62.0</b> |
|                                                                                                                                                             |                                                           | NIH83847.1     | <b>562</b> | <b>97</b> | 8.00E-127<br>(2e-144) | 245 | <b>43.6</b> |
| <b>3</b>                                                                                                                                                    | <i>Thermocatellispora<br/>tengchongensis</i> DSM<br>45615 | MBB5136872.1   | <b>520</b> | <b>98</b> | 2.00E-88<br>(3e-103)  | 216 | <b>41.5</b> |
| <b>4</b>                                                                                                                                                    | <i>Amycolatopsis<br/>methanolica</i> 239                  | WP_017983767.1 | <b>555</b> | <b>98</b> | 0.0                   | 348 | <b>62.7</b> |

|          |                                                                  |                |            |           |                       |     |             |
|----------|------------------------------------------------------------------|----------------|------------|-----------|-----------------------|-----|-------------|
| <b>5</b> | <i>Amycolatopsis</i><br><i>thermalba</i> strain 50.9b<br>NODE_16 | WP_094008248.1 | <b>555</b> | <b>98</b> | 0.0                   | 349 | <b>62.9</b> |
| <b>6</b> | <i>Amycolatopsis ruanii</i><br>strain 49.3e NODE_6               | WP_116109911.1 | <b>555</b> | <b>98</b> | 0.0                   | 349 | <b>62.9</b> |
| <b>7</b> | <i>Microbispora</i><br><i>siamensis</i> NBRC<br>104113           | GIH66240.1     | <b>557</b> | <b>97</b> | 6.00E-132<br>(4e-154) | 266 | <b>47.8</b> |
