# Supplementary material for: Steroid Metabolism in Thermophilic Actinobacterium Saccharopolyspora hirsuta VKM Ac-666T
Source: MDPI journal article supplement (doi:10.3390/microorganisms9122554), 2021-12-10
Supplement: s1 [file s1]

## Supporting materials

**article title:** Steroid Metabolism in Thermophilic Actinobacteria *Saccharopolyspora hirsuta* VKM Ac-666<sup>T</sup>

**journal name:** Microorganisms

**author names:** Tatyana Lobastova, Victoria Fokina, Sergey Tarlachkov, Andrey Shutov, Eugeny Bragin, Alexey Kazantsev, Marina Donova

**\*Correspondence:** 2vvfokina@gmail.com

**Supplementary Table S4.** List of homologous genes between *S. hirsuta* VKM Ac-666<sup>T</sup>, *R. jostii* RHA1, *M. tuberculosis* H37Rv.

| No. | <i>S. hirsuta</i> VKM Ac-666 |              | <i>R. jostii</i> RHA1 |                  | <i>M. tuberculosis</i> H37Rv |                  |
|-----|------------------------------|--------------|-----------------------|------------------|------------------------------|------------------|
|     | Gene                         | Protein acc. | Protein acc.          | Identity, % a.a. | Protein acc.                 | Identity, % a.a. |
| 1.  | <i>mce4F</i>                 | KAA5825886.1 | WP_011597044.1        | <b>34.1</b>      | CCP46316.1                   | <b>29.9</b>      |
| 2.  | <i>mce4E</i>                 | KAA5825887.1 | WP_011597043.1        | <b>37.1</b>      | CCP46317.1                   | <b>33.2</b>      |
| 3.  | <i>mce4D</i>                 | KAA5825888.1 | WP_011597042.1        | <b>34.1</b>      | CCP46318.1                   | <b>33.3</b>      |
| 4.  | <i>mce4C</i>                 | KAA5825937.1 | WP_011597041.1        | <b>34.0</b>      | CCP46319.1                   | <b>32.2</b>      |
| 5.  | <i>mce4B</i>                 | KAA5825889.1 | WP_011597040.1        | <b>45.9</b>      | CCP46320.1                   | <b>31.4</b>      |
| 6.  | <i>mce4A</i>                 | KAA5825890.1 | WP_009477765.1        | <b>29.3</b>      | CCP46321.1                   | <b>19.8</b>      |
| 7.  | <i>yrbEb</i>                 | KAA5825891.1 | WP_011597039.1        | <b>48.4</b>      | CCP46322.1                   | <b>48.8</b>      |

|     |               |              |                |             |            |             |
|-----|---------------|--------------|----------------|-------------|------------|-------------|
| 8.  | <i>yrbEa</i>  | KAA5825892.1 | WP_009477764.1 | <b>47.9</b> | CCP46323.1 | <b>47.9</b> |
| 9.  | <i>fabG3</i>  | KAA5825893.1 | WP_011597603.1 | <b>50.0</b> | CCP44774.1 | <b>50.0</b> |
| 10. | <i>hsd4A</i>  | KAA5825895.1 | WP_011597038.1 | <b>58.8</b> | CCP46324.1 | <b>59.9</b> |
| 11. | <i>fadE26</i> | KAA5825896.1 | WP_009477760.1 | <b>75.0</b> | CCP46326.1 | <b>71.7</b> |
| 12. | <i>fadE27</i> | KAA5825897.1 | WP_011597036.1 | <b>63.2</b> | CCP46327.1 | <b>52.2</b> |
| 13. | <i>fadD17</i> | KAA5825898.1 | WP_011597035.1 | <b>60.7</b> | CCP46328.1 | <b>53.9</b> |
| 14. | <i>fadD19</i> | KAA5825902.1 | WP_009477756.1 | <b>60.5</b> | CCP46337.1 | <b>57.9</b> |
| 15. | <i>echA19</i> | KAA5825903.1 | WP_011597033.1 | <b>77.2</b> | CCP46338.1 | <b>71.9</b> |
| 16. | <i>ltp4</i>   | KAA5825907.1 | WP_009477751.1 | <b>69.3</b> | CCP46344.1 | <b>67.3</b> |
| 17. | <i>ltp3</i>   | KAA5825908.1 | WP_009477750.1 | <b>80.8</b> | CCP46345.1 | <b>78.8</b> |
| 18. | <i>ksdI</i>   | KAA5825910.1 | WP_011597028.1 | <b>50.3</b> | -          | -           |
| 19. | <i>cypI25</i> | KAA5825911.1 | WP_009477746.1 | <b>73.3</b> | CCP46367.1 | <b>66.2</b> |
| 20. | <i>fadA5</i>  | KAA5825912.1 | WP_011597025.1 | <b>74.6</b> | CCP46368.1 | <b>71.7</b> |
| 21. | <i>hsaB</i>   | KAA5825914.1 | WP_005244804.1 | <b>56.2</b> | CCP46390.1 | <b>51.9</b> |
| 22. | <i>hsaC</i>   | KAA5825915.1 | WP_011596919.1 | <b>80.6</b> | CCP46391.1 | <b>81.6</b> |
| 23. | <i>hsaD</i>   | KAA5825916.1 | WP_011596918.1 | <b>73.7</b> | CCP46392.1 | <b>65.3</b> |

|     |               |              |                |             |            |             |
|-----|---------------|--------------|----------------|-------------|------------|-------------|
| 24. | <i>hsaA</i>   | KAA5825917.1 | WP_011596917.1 | <b>68.7</b> | CCP46393.1 | <b>64.6</b> |
| 25. | <i>hsaF</i>   | KAA5825918.1 | WP_009477596.1 | <b>82.1</b> | CCP46356.1 | <b>79.2</b> |
| 26. | <i>hsaG</i>   | KAA5825919.1 | WP_009477595.1 | <b>71.4</b> | CCP46357.1 | <b>68.5</b> |
| 27. | <i>hsaE</i>   | KAA5825920.1 | WP_009477594.1 | <b>65.3</b> | CCP46358.1 | <b>64.1</b> |
| 28. | <i>kstD4</i>  | KAA5825921.1 | WP_011597824.1 | <b>31.1</b> | CCP44583.1 | <b>33.1</b> |
| 29. | <i>kstD3</i>  | KAA5825922.1 | WP_011596914.1 | <b>65.8</b> | CCP46359.1 | <b>62.2</b> |
| 30. | <i>kshA</i>   | KAA5825923.1 | WP_016884082.1 | <b>69.8</b> | CCP46348.1 | <b>61.6</b> |
| 31. | <i>kshB</i>   | KAA5825925.1 | WP_011598098.1 | <b>50.9</b> | CCP46394.1 | <b>54.6</b> |
| 32. | <i>ltp2</i>   | KAA5825927.1 | WP_011596878.1 | <b>76.2</b> | CCP46362.1 | <b>74.9</b> |
| 33. | <i>chsH1</i>  | KAA5825928.1 | WP_011596877.1 | <b>53.2</b> | CCP46363.1 | <b>53.9</b> |
| 34. | <i>chsH2</i>  | KAA5825929.1 | WP_011596876.1 | <b>54.9</b> | CCP46364.1 | <b>52.4</b> |
| 35. | <i>fadE29</i> | KAA5825930.1 | WP_011596875.1 | <b>71.8</b> | CCP46365.1 | <b>68.5</b> |
| 36. | <i>fadE28</i> | KAA5825036.1 | WP_011596874.1 | <b>52.9</b> | CCP46366.1 | <b>45.1</b> |
| 37. | <i>kstR</i>   | KAA5825025.1 | WP_009477547.1 | <b>63.9</b> | CCP46397.1 | <b>60.4</b> |
| 38. | <i>echA20</i> | KAA5825028.1 | WP_007300903.1 | <b>62.7</b> | CCP46372.1 | <b>60.7</b> |
| 39. | <i>ipdA</i>   | KAA5825029.1 | WP_011597005.1 | <b>63.2</b> | CCP46373.1 | <b>59.5</b> |

|     |               |              |                |             |            |             |
|-----|---------------|--------------|----------------|-------------|------------|-------------|
| 40. | <i>ipdB</i>   | KAA5825030.1 | WP_011597004.1 | <b>54.5</b> | CCP46374.1 | <b>58.5</b> |
| 41. | <i>ipdC</i>   | KAA5825038.1 | WP_011597003.1 | <b>63.0</b> | CCP46375.1 | <b>65.3</b> |
| 42. | <i>kstR2</i>  | KAA5825039.1 | WP_009477673.1 | <b>48.3</b> | CCP46379.1 | <b>43.4</b> |
| 43. | <i>ipdF</i>   | KAA5825031.1 | WP_011596964.1 | <b>63.0</b> | CCP46381.1 | <b>62.6</b> |
| 44. | <i>fadE30</i> | KAA5825032.1 | WP_009477671.1 | <b>68.3</b> | CCP46382.1 | <b>65.2</b> |
| 45. | <i>echA13</i> | KAA5825033.1 | WP_005254492.1 | <b>72.9</b> | CCP44702.1 | <b>41.5</b> |
| 46. | <i>fadE31</i> | KAA5825040.1 | WP_011596961.1 | <b>70.9</b> | CCP46384.1 | <b>62.8</b> |
| 47. | <i>fadE32</i> | KAA5825034.1 | WP_011596960.1 | <b>48.5</b> | CCP46385.1 | <b>43.9</b> |
| 48. | <i>fadE33</i> | KAA5825035.1 | WP_011596959.1 | <b>46.8</b> | CCP46386.1 | <b>38.4</b> |
| 49. | <i>hsaE3</i>  | KAA5838019.1 | WP_011597907.1 | <b>58.8</b> | -          | -           |
| 50. | <i>hsaG3</i>  | KAA5838020.1 | WP_011599026.1 | <b>75.0</b> | -          | -           |
| 51. | <i>hsaF3</i>  | KAA5838021.1 | WP_011599025.1 | <b>82.4</b> | -          | -           |
| 52. | <i>casA</i>   | KAA5838022.1 | WP_011597920.1 | <b>44.1</b> | -          | -           |
| 53. | <i>hsaD3</i>  | KAA5838023.1 | WP_009479043.1 | <b>71.5</b> | -          | -           |
| 54. | <i>kstR3</i>  | KAA5838439.1 | WP_011597904.1 | <b>59.9</b> | -          | -           |
| 55. | <i>kstD2</i>  | KAA5838025.1 | WP_011599760.1 | <b>64.9</b> | -          | -           |

|     |                                 |              |                |             |            |             |
|-----|---------------------------------|--------------|----------------|-------------|------------|-------------|
| 56. | <i>kstDI</i>                    | KAA5838026.1 | WP_011597919.1 | <b>51.2</b> | -          | -           |
| 57. | <i>kshA</i>                     | KAA5838028.1 | WP_050787406.1 | <b>68.3</b> | -          | -           |
| 58. | <i>kshB</i>                     | KAA5838030.1 | WP_011597937.1 | <b>50.3</b> | -          | -           |
| 59. | <i>ksdI</i>                     | KAA5838031.1 | WP_011599721.1 | <b>56.1</b> | -          | -           |
| 60. | <i>hsaB3</i>                    | KAA5838032.1 | WP_011597905.1 | <b>60.8</b> | -          | -           |
| 61. | <i>hsaA3</i>                    | KAA5838033.1 | WP_009479048.1 | <b>56.6</b> | -          | -           |
| 62. | <i>hsaC3</i>                    | KAA5838034.1 | WP_011597910.1 | <b>60.5</b> | -          | -           |
| 63. | <i>fadD3</i>                    | KAA5826116.1 | WP_011596962.1 | <b>58.9</b> | CCP46383.1 | <b>57.1</b> |
| 64. | <i>fadA6</i>                    | KAA5824600.1 | WP_011596965.1 | <b>71.2</b> | CCP46378.1 | <b>68.1</b> |
| 65. | <i>choD</i>                     | KAA5833518.1 | WP_011598180.1 | <b>62.8</b> | CCP46231.1 | <b>65.4</b> |
| 66. | <i>choE</i>                     | KAA5835081.1 | WP_011596408.1 | <b>33.0</b> | -          | -           |
| 67. | <i>kstR3</i>                    | KAA5828487.1 | WP_011597904.1 | <b>62.9</b> | -          | -           |
| 68. | <i>casA</i>                     | KAA5828430.1 | WP_011597920.1 | <b>49.8</b> | -          | -           |
| 69. | <i>casC/chsE3</i>               | KAA5828431.1 | WP_011597921.1 | <b>63.6</b> | CCP43000.1 | <b>46.0</b> |
| 70. | <i>casE</i>                     | KAA5828432.1 | WP_011597922.1 | <b>60.5</b> | -          | -           |
| 71. | <i>3<math>\alpha</math>-hsd</i> | KAA5828433.1 | WP_011595206.1 | <b>65.9</b> | -          | -           |

|     |             |              |                |             |            |             |
|-----|-------------|--------------|----------------|-------------|------------|-------------|
| 72. | <i>casH</i> | KAA5828434.1 | WP_011597925.1 | <b>63.4</b> | CCP46180.1 | <b>56.6</b> |
| 73. | <i>casI</i> | KAA5828435.1 | WP_011597926.1 | <b>63.4</b> | -          | -           |
| 74. | <i>casE</i> | KAA5838304.1 | WP_011597922.1 | <b>30.1</b> | -          | -           |
| 75. | <i>casG</i> | KAA5838310.1 | WP_011597924.1 | <b>39.6</b> | -          | -           |
