# Supplementary material for: Steroid Metabolism in Thermophilic Actinobacterium Saccharopolyspora hirsuta VKM Ac-666T
Source: MDPI journal article supplement (doi:10.3390/microorganisms9122554), 2021-12-10
Supplement: s1 [file s1]

## Supporting materials

**article title:** Steroid Metabolism in Thermophilic Actinobacteria *Saccharopolyspora hirsuta* VKM Ac-666<sup>T</sup>

**journal name:** Microorganisms

**author names:** Tatyana Lobastova, Victoria Fokina, Sergey Tarlachkov, Andrey Shutov, Eugeny Bragin, Alexey Kazantsev, Marina Donova

**\*Correspondence:** 2vvfokina@gmail.com

**Supplementary Table S1.** List of thermophilic and thermotolerant bacteria to be screened for the key genes of the steroid catabolic 9,10-*seco*-pathway.

| No. | Strain                                                                      | GenBank ID                        |
|-----|-----------------------------------------------------------------------------|-----------------------------------|
| 1.  | <i>Acidimicrobium ferrooxidans</i> DSM 10331                                | CP001631.1                        |
| 2.  | <i>Acidithiobacillus thiooxidans</i> ATCC 19377                             | CP045571.1                        |
| 3.  | <i>Acidothermus cellulolyticus</i> 11B                                      | CP000481.1                        |
| 4.  | <i>Alicyclobacillus acidocaldarius</i> subsp. <i>acidocaldarius</i> DSM 446 | CP001727.1                        |
| 5.  | <i>Amycolatopsis granulosa</i> DSM 45669                                    | JAANOV010000001.1                 |
| 6.  | <i>Amycolatopsis methanolica</i> 239                                        | AQUL01000001.1-<br>AQUL01000002.1 |
| 7.  | <i>Amycolatopsis ruanii</i> 49.3e                                           | PQHY01000001-<br>PQHY01000170     |
| 8.  | <i>Amycolatopsis thermalba</i> 50.9b                                        | PQHX01000001-<br>PQHX01000181     |
| 9.  | <i>Bacillus circulans</i> strain FDAARGOS 783                               | CP053989.1                        |
| 10. | <i>Bacillus coagulans</i> ATCC 7050                                         | CP009709.1                        |

|     |                                                               |                                   |
|-----|---------------------------------------------------------------|-----------------------------------|
| 11. | <i>Bacillus licheniformis</i> ATCC 14580                      | CP000002.3                        |
| 12. | <i>Bacillus subtilis</i> _subsp. <i>subtilis</i> 168          | AL009126.3                        |
| 13. | <i>Bifidobacterium thermophilum</i> 1543B                     | PCGX01000001-<br>PCGX01000016     |
| 14. | <i>Brevibacillus laterosporus</i> DSM 25                      | CP017705.1                        |
| 15. | <i>Chloroflexus</i> sp. Y-400-fl                              | CP001364.1                        |
| 16. | <i>Desulfotomaculum nigrificans</i> DSM 574                   | AEVP02000001-<br>AEVP02000007     |
| 17. | <i>Geobacillus kaustophilus</i> HTA426                        | BA000043.1                        |
| 18. | <i>Geobacillus thermocatenulatus</i> strain KCTC 3921         | CP018058.1                        |
| 19. | <i>Laceyella sacchari</i> DSM 43356                           | SMDD01000001-<br>SMDD01000021     |
| 20. | <i>Leptospira biflexa</i> 201601962                           | RQHA01000001-<br>RQHA01000012     |
| 21. | <i>Lysinibacillus sphaericus</i> DSM 28                       | CP019980.1                        |
| 22. | <i>Methanothermobacter thermautotrophicus</i> Delta H         | AE000666.1                        |
| 23. | <i>Methylococcus capsulatus</i> Bath                          | AE017282.2                        |
| 24. | <i>Microbispora rosea</i> subsp. <i>aerata</i> JCM 3076       | BMPY01000001-<br>BMPY01000111     |
| 25. | <i>Microbispora siamensis</i> NBRC 104113                     | BOOF01000001.1-<br>BOOF01000148.1 |
| 26. | <i>Moorella thermoacetica</i> strain DSM 103284               | CP017237.1                        |
| 27. | <i>Parageobacillus thermoglucosidasius</i> strain NCIMB 11955 | CP016622.1                        |
| 28. | <i>Rubrobacter radiotolerans</i> strain RSPS-4                | CP007514.1                        |
| 29. | <i>Rubrobacter taiwanensis</i> Yellowstone                    | SKBU01000001-<br>SKBU01000057     |

|     |                                                                            |                                         |
|-----|----------------------------------------------------------------------------|-----------------------------------------|
| 30. | <i>Rubrobacter xylanophilus</i> DSM 9941                                   | CP000386.1                              |
| 31. | <i>Ruminiclostridium thermocellum</i> DSM 2360                             | CP016502.1                              |
| 32. | <i>Saccharomonospora azurea</i> NA-128                                     | CM001466.1                              |
| 33. | <i>Saccharomonospora viridis</i> DSM 43017                                 | CP001683.1                              |
| 34. | <i>Saccharopolyspora rectivirgula</i> DSM 43113                            | JNVU01000001.1-<br>JNVU01000050.1       |
| 35. | <i>Streptomyces calidiresistens</i> DSM 42108                              | VKHS01000001-<br>VKHS01001643           |
| 36. | <i>Streptomyces thermoautotrophicus</i> UBT1                               | JYIJ01000001.1-<br>JYIJ01000019.1       |
| 37. | <i>Streptomyces thermocarboxydus</i> BPSAC147                              | STGO01000001-<br>STGO01000102           |
| 38. | <i>Streptomyces thermoviolaceus</i> subsp. <i>thermoviolaceus</i> JCM 4843 | BMVZ01000001-<br>BMVZ01000049           |
| 39. | <i>Streptomyces thermovulgaris</i> NRRL B-12375                            | MUME01000001-<br>MUME01000595           |
| 40. | <i>Streptosporangium album</i> DSM 43023                                   | JACHJU010000001-<br>JACHJU010000014     |
| 41. | <i>Sulfolobus acidocaldarius</i> DG1                                       | CP020364.1                              |
| 42. | <i>Synechococcus lividus</i> PCC 6715                                      | CP018092.1                              |
| 43. | <i>Thermoactinomyces vulgaris</i> strain 2H                                | CP039710.1                              |
| 44. | <i>Thermoanaerobacterium thermosaccharolyticum</i> DSM 571                 | CP002171.1                              |
| 45. | <i>Thermobifida fusca</i> YX                                               | CP000088.1                              |
| 46. | <i>Thermobispora bispora</i> DSM 43833                                     | CP001874.1                              |
| 47. | <i>Thermocatellispora tengchongensis</i> DSM 45615                         | JACHGN010000001.1-<br>JACHGN010000063.1 |

|            |                                                     |                               |
|------------|-----------------------------------------------------|-------------------------------|
| <b>48.</b> | <i>Thermodesulfobacterium thermophilum</i> DSM_1276 | ATXI01000001-<br>ATXI01000046 |
| <b>49.</b> | <i>Thermomonospora curvata</i> DSM 43183            | CP001738.1                    |
| <b>50.</b> | <i>Thermoplasma acidophilum</i> DSM 1728            | AL139299.1                    |
| <b>51.</b> | <i>Thermus aquaticus</i> Y51MC23                    | CP010822.1                    |
| <b>52.</b> | <i>Thermus thermophilus</i> HB8                     | AP008226.1                    |
